# Supplementary material for: Modular synthesis, spectroscopic characterization and in situ functionalization using “click” chemistry of azide terminated amide containing self-assembled monolayers
Source: Royal Society of Chemistry journal article supplement (doi:10.1039/c3ra43415j), 2013-01-01
Supplement: c3ra43415j.pdf [file c3ra43415j.pdf]

**Supporting Information**

**Modular Synthesis, Spectroscopic  
Characterization and In-situ Functionalization  
using “click” Chemistry of Azide Terminated  
Amide Containing Self-Assembled Monolayers**

Sabyasachi Bandyopadhyay, Sohini Mukherjee and Abhishek Dey

Department of Inorganic Chemistry, Indian Association for the Cultivation of Science

2A & 2B Raja S. C. Mullick Road, Jadavpur, Kolkata - 700032, India

## SI 1. Synthetic Scheme:

### Scheme of synthesis of Amidealkylthiol (Diluent):

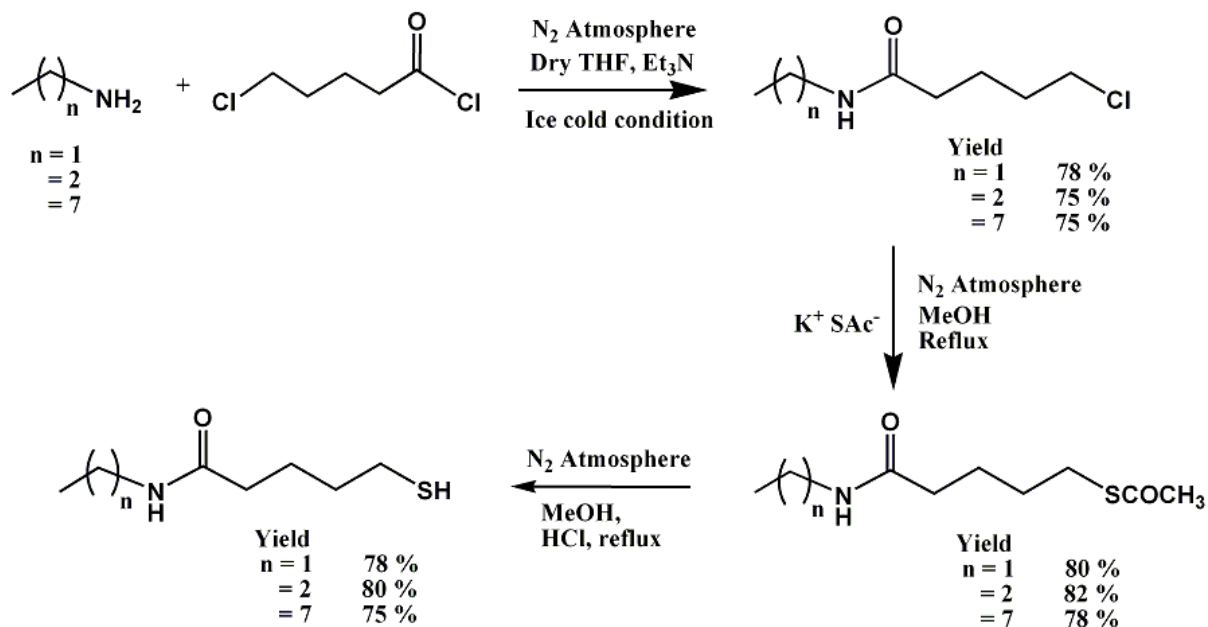

## SI 2. Surface Characterization

### SERS

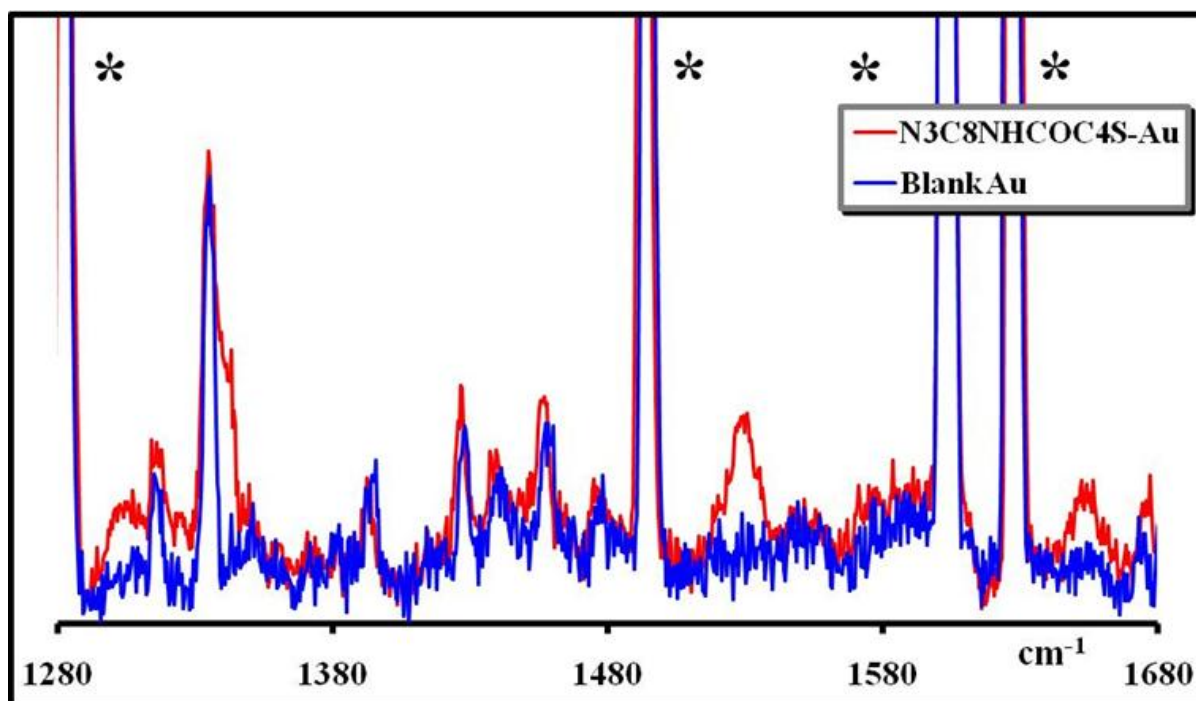

Surface enhanced Raman spectrum (SERS) of  $\text{N}_3\text{C}_8\text{NHCOC}_4\text{SH}$  SAM on Au disk. The designated peaks at  $1306\text{ cm}^{-1}$ ,  $1342\text{ cm}^{-1}$ ,  $1530\text{ cm}^{-1}$  and  $1654\text{ cm}^{-1}$  are for amide III, azide symmetric stretching frequency, amide II and amide I respectively. \* represents the plasma lines.

### Contact Angle (CA) Goniometry

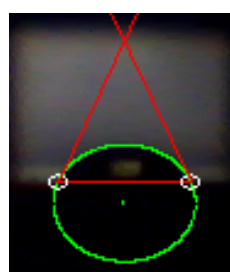

CA ~  $65 \pm 1.7^\circ$

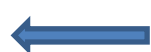

$\text{N}_3\text{C}_2\text{NHCOC}_4\text{SH}$

$\text{N}_3\text{C}_8\text{NHCOC}_4\text{SH}$

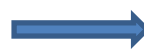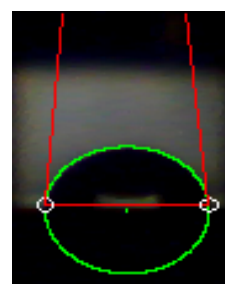

CA ~  $84 \pm 1.6^\circ$

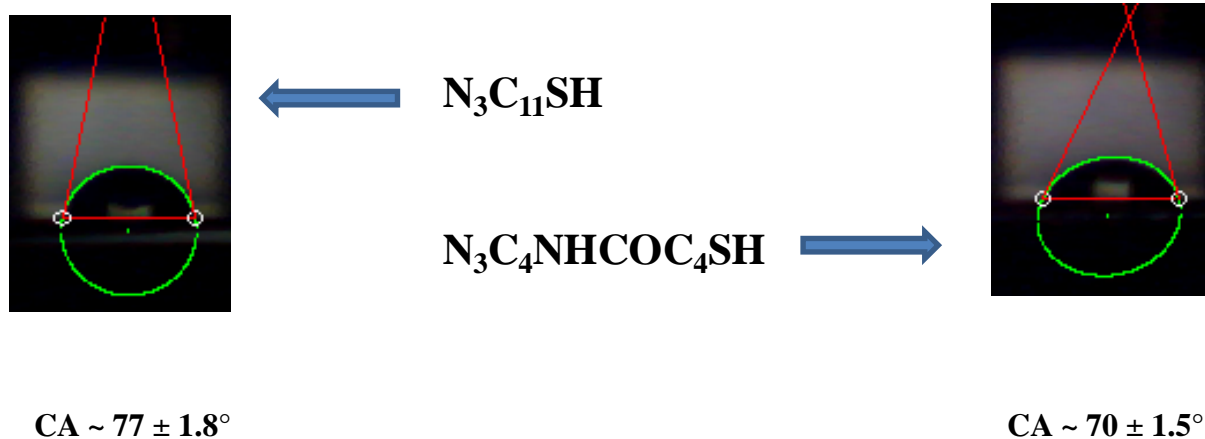

### SI 3. Synthesis Procedures and Characterization data

#### SI 3a 1-Azidoethylamine ( $\text{N}_3\text{C}_2\text{NH}_2$ )

To a solution of 2-Bromoethylamine hydrobromide (1 gm, 5.0 mmol) in 7 ml water, 1 gm of sodium azide (15 mmol) was added and the reaction was stirred at  $85^\circ\text{C}$  for 12 hours. After cooling the reaction mixture 200 mg of sodium hydroxide was added and stirred for 10 minute. Then diethyl ether and water were added to the reaction vessel and after workup the organic layer was collected, dried over anhydrous  $\text{Na}_2\text{SO}_4$  and evaporated. The compound was purified by column chromatography on silica gel with 8% MeOH- DCM mixture as the eluent. Light yellow liquid.

Yield : 92% .  $^1\text{H}$  NMR ( $\text{CDCl}_3$ , 500 MHz)  $\delta$  (ppm): 3.35 (t, 2H,  $J = 5.5$  Hz), 2.87 (t, 2H,  $J = 6$  Hz). ( $^{13}\text{C}$  NMR,  $\text{CDCl}_3$ ): 54.8, 41.5. IR spectra ( $\text{cm}^{-1}$ ): 3346 (NH- stretching), 2106 ( $-\text{N}_3$  stretching),

#### SI 3b *N*-(4-Azidobutyl)phthalimide ( $\text{N}_3\text{C}_4\text{Phth}$ )

To a solution of *N*-(4-Bromobutyl)phthalimide (1 gm, 3.5 mmol) in 10 ml DMF, 700 mg of sodium azide (10.5 mmol) was added and the reaction was stirred at  $85^\circ\text{C}$  for 12 hours in nitrogen atmosphere. After cooling the reaction mixture water and diethyl ether were added to the reaction vessel and after workup the organic layer was collected, dried over

anhydrous Na<sub>2</sub>SO<sub>4</sub> and evaporated. The product was purified by column chromatography on silica gel with DCM as the eluent. White solid product was obtained.

Yield : 86% . IR spectra (cm<sup>-1</sup>): 2096 (N<sub>3</sub>- stretching), 1772, 1710, 1678 (phthalimide). ESI-MS (+ve ion mode, MeOH) m/z = 283.3(100%) [MK<sup>+</sup>].

**SI 3c** *1-Azidobutylamine (N<sub>3</sub>C<sub>4</sub>NH<sub>2</sub>)*

To a solution of *N*-(4-Azidobutyl)phthalimide (0.8 gm, 3.0 mmol) in 70 ml EtOH, 3.6 ml of hydrazine hydrate (65 mmol) was added and the reaction was stirred at for 24 hours. After the reaction the precipitate was removed by filtration, the filtrate was evaporated and extracted with chloroform. After evaporating the chloroform the product was purified by column chromatography on silica gel with 2% MeOH- DCM mixture as the eluent. Light yellow oily compound.

Yield : 62% . <sup>1</sup>H NMR (CD<sub>3</sub>OD, 500 MHz) δ (ppm): 3.3 (t, 2H, *J* = 5.5 Hz), 2.78 (t, 2H, *J* = 6.5 Hz), 1.64 (m, 4H). <sup>13</sup>C NMR (CDCl<sub>3</sub>): 50.8, 40, 27.6, 25.8. IR spectra (cm<sup>-1</sup>): 3355 (NH-stretching), 2098 (N<sub>3</sub>- stretching).

**SI 3d** *N*-(8-phthalimide)-1-octanol (*OHC<sub>8</sub>Phth*)

To a solution of 8-bromo-1-octanol (1 gm, 4.8 mmol) in 10 ml DMF, 0.9 gm of potassium phthalimide (5.0 mmol) was added and the reaction was stirred at for 2 hours. After the reaction CHCl<sub>3</sub> and water were added to the reaction vessel and after workup the organic layer was washed with 0.2 N NaOH and water, dried over anhydrous Na<sub>2</sub>SO<sub>4</sub>, after evaporating the solvent a colourless viscous liquid compound was obtained.

Yield : 88% . IR spectra (cm<sup>-1</sup>): 3458 (-OH stretching), 1772, 1714, 1670.

**SI 3e** *N*-(8-phthalimide)-1-methanesulphonate (*OMsC<sub>8</sub>Phth*)

To a solution of *N*-(8-phthalimide)-1-octanol (0.88 gm, 3.2 mmol) in 20 ml dry THF, 0.9 ml of triethylamine (6.5 mmol) was added and stirred for 10 minute at 0<sup>o</sup>C in nitrogen atmosphere, then to the reaction mixture 0.5 ml (6.5 mmol) of methanesulfonyl chloride

(OMsCl) (dissolved in THF) was added drop wise and stirred at for 2 hours at low temperature. After the reaction water and diethyl ether were added to the reaction vessel and after workup the organic layer was collected, dried over anhydrous Na<sub>2</sub>SO<sub>4</sub> and evaporated. Colourless viscous liquid was obtained.

Yield : 80% . IR spectra (cm<sup>-1</sup>): 1772, 1714, 1614, 1353, 1174, 943, 721, 530.

**SI 3f** *N*-(8-Azidooctyl)phthalimide (N<sub>3</sub>C<sub>8</sub>Phth)

The synthesis procedure of *N*-(8-Azidooctyl)phthalimide was similar as mentioned above. Since here the leaving group was OMs so temperature applied was 60<sup>0</sup>C. Light yellow liquid.

Yield : 85%. IR spectra (cm<sup>-1</sup>): 2096 (-N<sub>3</sub> stretching), 1772, 1714, 1614 (phthalimide). ESI-MS (+ve ion mode, MeOH) m/z = 301.2 (100%) [MH<sup>+</sup>].

**SI 3g** *1*-Azidooctylamine (N<sub>3</sub>C<sub>8</sub>NH<sub>2</sub>)

The synthesis procedure of 1-Azidooctylamine was also similar as mentioned above in 1-Azidobutylamine synthesis. Light yellow liquid.

Yield : 68%. <sup>1</sup>H NMR (CDCl<sub>3</sub>, 300 MHz) δ (ppm): 3.27 (t, 2H, *J* = 5.7 Hz), 2.7 (t, 2H, *J* = 6.8 Hz), 1.6 (m, 4H), 1.45 (m, 4H), 1.3 (m, 4H). <sup>13</sup>C NMR (CDCl<sub>3</sub>): 51.5, 42.3, 33.8, 29.4, 29, 28.8, 26.8, 26.6. IR spectra (cm<sup>-1</sup>): 3355 (NH- stretching), 2098 (N<sub>3</sub>- stretching).

**Linkers –**

**Azidoalkylamidechloride [N<sub>3</sub>C<sub>(n+2)</sub>NHCOC<sub>4</sub>Cl] (n = 0,2,6)**

To a solution of Azidoalkylamine in dry THF, two equivalent of triethylamine was added and stirred for 10 minute at 0<sup>0</sup>C in nitrogen atmosphere, then to the reaction mixture two equivalent of 5-chlorovaleroyl chloride (dissolved in THF) was added drop wise and stirred for at least 2 hours at low temperature. After the reaction water and diethyl ether were added to the reaction vessel. After workup the organic layer was collected, dried over anhydrous Na<sub>2</sub>SO<sub>4</sub> and evaporated

**SI 3h** *1-Azidoethylamidebutylchloride*

The product was purified by column chromatography on silica gel with 2% MeOH-DCM mixture as the eluent. Light yellow liquid compound was obtained.

Yield : 72%. <sup>1</sup>H NMR (CDCl<sub>3</sub>, 500 MHz): δ 6 (s, 1H), 3.52 (t, 2H, *J* = 5.5 Hz), 3.38-3.44 (m, 4H), 2.22 (t, 2H, *J* = 4.5 Hz), 1.76-1.81 (m, 4H). <sup>13</sup>C NMR (CDCl<sub>3</sub>): 173, 51, 44.7, 39, 35.7, 32, 23. IR spectra (cm<sup>-1</sup>): 2102 (N<sub>3</sub><sup>-</sup> stretching), 1647, 1550 (amide stretching & bending). ESI-MS (+ve ion mode, MeOH) *m/z* = 205.05 (50%) [MH<sup>+</sup>], 227.04 (100%) [MNa<sup>+</sup>].

**SI 3i** *1-Azidobutylamidebutylchloride*

The product was purified by column chromatography on silica gel with 40% EtOAc-Hexane mixture as the eluent. Light yellow liquid compound was obtained.

Yield : 65%. <sup>1</sup>H NMR (CDCl<sub>3</sub>, 500 MHz): δ 5.5 (s, 1H), 3.48 (t, 2H, *J* = 6 Hz), 3.2-3.26 (m, 4H), 2.14 (t, 2H, *J* = 6.5 Hz), 1.69-1.76 (m, 4H), 1.51-1.57 (m, 4H). <sup>13</sup>C NMR (CDCl<sub>3</sub>): 172.5, 51, 44.6, 39, 35.8, 32, 27, 26.3, 23.02. IR spectra (cm<sup>-1</sup>): 2098 (N<sub>3</sub><sup>-</sup> stretching), 1650, 1554 (amide stretching & bending).

**SI 3j** *1-Azidooctylamidebutylchloride*

The product was purified by column chromatography on silica gel with 2% MeOH-DCM mixture as the eluent. Light yellow liquid compound was obtained.

Yield : 62%. <sup>1</sup>H NMR (CDCl<sub>3</sub>, 300 MHz): δ 5.53 (s, 1H), 3.48 (t, 2H, *J* = 6 Hz), 3.13-3.21 (m, 4H), 2.13 (t, 2H, *J* = 6.6 Hz), 1.68-1.78 (m, 8H), 1.1-1.5 (m, 8H). <sup>13</sup>C NMR (CDCl<sub>3</sub>): 172.4, 51.5, 44.7, 39.6, 35.8, 32, 29.7, 29.2, 29.1, 28.8, 26.8, 26.7, 23.1. IR spectra (cm<sup>-1</sup>): 2095 (N<sub>3</sub><sup>-</sup> stretching), 1637, 1541 (amide stretching & bending). ESI-MS (+ve ion mode, MeOH) *m/z* = 311.1 (100%) [MNa<sup>+</sup>].

***Azidoalkylamidethioacetate [N<sub>3</sub>C<sub>(n+2)</sub>NHCOC<sub>4</sub>SAc]***

All thioacetate compounds were synthesised as reported procedure.<sup>1</sup>

**SI 3k** *1-Azidoethylamidebutylthioacetate*

The product was purified by column chromatography on silica gel with 2% MeOH-DCM mixture as the eluent. Light yellow liquid compound was obtained.

Yield : 85%. <sup>1</sup>H NMR (CDCl<sub>3</sub>, 500 MHz): δ 6 (s, 1H), 3.35 (m, 4H), 2.81 (t, 2H, *J* = 7 Hz), 2.26 (s, 3H), 2.16 (t, 2H, *J* = 7), 1.2-1.6 (m, 4H). <sup>13</sup>C NMR (CDCl<sub>3</sub>): 196.2, 173, 39, 35.8, 29.8, 29.2, 28.6, 23. IR spectra (cm<sup>-1</sup>): 2102 (N<sub>3</sub><sup>-</sup> stretching), 1691.5 (carbonyl stretch of thioacetate), 1647, 1544 (amide stretching & bending). ESI-MS (+ve ion mode, MeOH) *m/z* = 267.1 (100%) [MNa<sup>+</sup>].

**SI 3l** *1-Azidobutylamidebutylthioacetate*

The product was purified by column chromatography on silica gel with 2% MeOH-DCM mixture as the eluent. Light yellow liquid compound was obtained.

Yield : 82%. <sup>1</sup>H NMR (CDCl<sub>3</sub>, 500 MHz): δ 6.1 (s, 1H), 3.47 (t, 2H, *J* = 6 Hz), 3.2 (t, 2H, *J* = 6.5), 2.8 (t, 2H, *J* = 7 Hz), 2.24 (s, 3H), 2.1 (t, 2H, *J* = 7.5), 1.5-1.7 (m, 8H). <sup>13</sup>C NMR (CDCl<sub>3</sub>): 196, 172.6, 51, 44, 38, 35, 32, 30.5, 28.5, 26.2. IR spectra (cm<sup>-1</sup>): 2096 (N<sub>3</sub><sup>-</sup> stretching), 1691 (carbonyl stretch of thioacetate), 1647, 1551 (amide stretching & bending).

**SI 3m** *1-Azidooctylamidebutylthioacetate*

The product was purified by column chromatography on silica gel with 45% EtOAc-Hexane mixture as the eluent. Light yellow liquid compound was obtained.

Yield : 80%. IR spectra (cm<sup>-1</sup>): 2096.5 (N<sub>3</sub><sup>-</sup> stretching), 1691.4 (carbonyl stretch of thioacetate), 1645, 1552 (amide stretching & bending). ESI-MS (+ve ion mode, MeOH) *m/z* = 329.4 (100%) [MH<sup>+</sup>], 351.4 (25%) [MNa<sup>+</sup>].

**Diluents –**

**Amidealkylchloride [C<sub>(n+1)</sub>NHCOC<sub>4</sub>Cl] (n = 1,2,7)**

**SI 3n** *Ethylamidebutylchloride*

Light yellow liquid compound was obtained.



Yield : 78%.  $^1\text{H}$  NMR ( $\text{CDCl}_3$ , 500 MHz):  $\delta$  5.7 (s, 1H), 3.48 (t, 2H,  $J = 4$  Hz), 3.18-3.24 (m, 4H), 2.13 (t, 2H,  $J = 7$  Hz), 1.7-1.77 (m, 4H), 1.06 (t, 3H,  $J = 5.5$ ).  $^{13}\text{C}$  NMR ( $\text{CDCl}_3$ ): 172.3, 44.7, 35.8, 34.4, 32, 23, 15. IR spectra ( $\text{cm}^{-1}$ ): 1645, 1553 (amide stretching & bending).

**SI 3o** *Propylamidebutylchloride*

The product was purified by column chromatography on silica gel with 65% EtOAc-Hexane mixture as the eluent. Light yellow viscous compound was obtained.

Yield : 75%.  $^1\text{H}$  NMR ( $\text{CDCl}_3$ , 300 MHz):  $\delta$  6.2 (s, 1H), 3.57 (t, 2H,  $J = 5$  Hz), 3.19 (q, 2H,  $J = 6$ ), 2.22 (t, 2H,  $J = 6.6$  Hz), 1.7-1.86 (m, 4H), 1.46-1.58 (m, 4H), 0.92 (t, 3H,  $J = 7.5$ ).  $^{13}\text{C}$  NMR ( $\text{CDCl}_3$ ): 172.6, 44.6, 41.2, 35.6, 32, 23, 22.8, 11. IR spectra ( $\text{cm}^{-1}$ ): 1645, 1553 (amide stretching & bending). ESI-MS (+ve ion mode, MeOH)  $m/z = 178.17$  (100%) [ $\text{MH}^+$ ].

**SI 3p** *Octylamidebutylchloride*

The product was purified by column chromatography on silica gel with DCM eluent. Light yellow densed liquid compound was obtained.

Yield : 75%.  $^1\text{H}$  NMR ( $\text{CDCl}_3$ , 500 MHz):  $\delta$  5.8 (s, 1H), 3.55 (t, 2H,  $J = 4$  Hz), 3.22 (q, 2H,  $J = 6$  Hz), 2.21 (t, 2H,  $J = 7$  Hz), 1.75-1.9 (m, 4H), 1.49 (t, 2H,  $J = 6.5$ ), 1.25-1.32 (m, 10H), 0.88 (t, 3H,  $J = 6.5$  Hz).  $^{13}\text{C}$  NMR ( $\text{CDCl}_3$ ): 172.47, 44.6, 39.7, 35.8, 33.25, 32, 29.7, 29.0, 27, 23.1, 22.6, 22.3, 14.2. IR spectra ( $\text{cm}^{-1}$ ): 1645, 1554 (amide stretching & bending). ESI-MS (+ve ion mode, MeOH)  $m/z = 248.18$  (100%) [ $\text{MH}^+$ ], 270.17 (90%) [ $\text{MNa}^+$ ].

**Amidealkylthioacetate [ $\text{C}_{(n+1)}\text{NHCOC}_4\text{SAc}$ ]**

All thioacetate compounds were synthesised as reported procedure.<sup>1</sup>

**SI 3q** *Ethylamidebutylthioacetate*

The product was purified by column chromatography on silica gel with 2% MeOH-DCM mixture as the eluent. Light yellow liquid compound was obtained.

Yield : 80%.  $^1\text{H}$  NMR ( $\text{CDCl}_3$ , 500 MHz):  $\delta$  5.7 (s, 1H), 3.52 (t, 2H,  $J = 6$  Hz), 3.22-3.28 (m, 4H), 2.81 (t, 2H,  $J = 7.5$  Hz), 2.29 (s, 3H), 2.15 (t, 2H,  $J = 8$ ), 1.7-1.8 (m, 4H), 1.1 (t, 3H,  $J =$

6 Hz).  $^{13}\text{C}$  NMR ( $\text{CDCl}_3$ ): 196.2, 172.5, 44.7, 36.2, 35.8, 32.1, 24.8, 23.1, 15. IR spectra ( $\text{cm}^{-1}$ ): 1691.6 (carbonyl stretch of thioacetate), 1645, 1551 (amide stretching & bending).

**SI 3r** *Propylamidebutylthioacetate*

The product was purified by column chromatography on silica gel with DCM as the eluent. Light yellow liquid compound was obtained.

Yield : 82%.  $^1\text{H}$  NMR ( $\text{CDCl}_3$ , 500 MHz):  $\delta$  5.75 (s, 1H), 3.52 (t, 2H,  $J = 6$  Hz), 3.14-3.19 (m, 2H), 2.82 (t, 2H,  $J = 7$  Hz), 2.28 (s, 3H), 2.15 (t, 2H,  $J = 7.5$ ), 1.6-1.8 (m, 4H), 0.95 (t, 3H,  $J = 6$  Hz).  $^{13}\text{C}$  NMR ( $\text{CDCl}_3$ ): 196.1, 172.6, 44.7, 41.3, 36.2, 35.8, 32.1, 28.8, 23.1, 11.4. IR spectra ( $\text{cm}^{-1}$ ): 1691.5 (carbonyl stretch of thioacetate), 1645, 1549 (amide stretching & bending). ESI-MS (+ve ion mode, MeOH)  $m/z = 240.11$  (100%) [ $\text{MNa}^+$ ].

**SI 3s** *Octylamidebutylthioacetate*

The product was purified by column chromatography on silica gel with DCM as the eluent. Light yellow viscous compound was obtained.

Yield : 78%. IR spectra ( $\text{cm}^{-1}$ ): 1693.4 (carbonyl stretch of thioacetate), 1639.4, 1541 (amide stretching & bending).

**Amidealkylthiol** [ $\text{C}_{(n+1)}\text{NHCOC}_4\text{SH}$ ]

All thiol compounds were synthesised as reported procedure.<sup>1</sup>

**SI 3t** *Ethylamidebutylthiol*

The product was purified by column chromatography on silica gel with 2% MeOH-DCM mixture as the eluent. Light yellow liquid compound was obtained.

Yield : 78%.  $^1\text{H}$  NMR ( $\text{CDCl}_3$ , 500 MHz):  $\delta$  5.85 (s, 1H), 3.51 (t, 2H,  $J = 5.5$  Hz), 3.23 (m, 2H), 2.15 (t, 2H,  $J = 6.5$  Hz), 1.7-1.8 (m, 4H), 1.09 (t, 3H,  $J = 7.5$ ).  $^{13}\text{C}$  NMR ( $\text{CDCl}_3$ ): 172.3, 44.6, 36, 34.4, 32, 24, 14. IR spectra ( $\text{cm}^{-1}$ ): 1645, 1553 (amide stretching & bending). ESI-MS (+ve ion mode, MeOH)  $m/z = 321.0$  (100%) [ $\text{MH}^+$ ], 343.0 (30%) [ $\text{MNa}^+$ ] (Mass of disulfide).

**SI 3u** *Propylamidebutylthiol*

The product was purified by column chromatography on silica gel with DCM as the eluent. Light yellow liquid compound was obtained.

Yield : 80%.  $^1\text{H}$  NMR ( $\text{CDCl}_3$ , 300 MHz):  $\delta$  6.36, 6.16 (s, 1H), 2.99 (q, 2H,  $J = 6.3$  Hz), 2.5 (t, 2H,  $J = 6$  Hz), 2.34 (t, 2H,  $J = 7$  Hz), 1.32-1.6 (m, 4H), 0.73 (t, 5H,  $J = 7$  Hz).  $^{13}\text{C}$  NMR ( $\text{CDCl}_3$ ): 172.7, 41.1, 38.5, 36, 30.5, 24, 22.7, 11.3. IR spectra ( $\text{cm}^{-1}$ ): 2545 (-SH stretching) 1643, 1553 (amide stretching & bending). ESI-MS (+ve ion mode, MeOH)  $m/z = 348.95$  (60%) [ $\text{MH}^+$ ], 370.91 (100%) [ $\text{MNa}^+$ ] (Mass of disulfide).

**SI 3v** *Octylamidebutylthiol*

The product was purified by column chromatography on silica gel with 30% EtOAc-Hexane mixture as the eluent. Light yellow viscous compound was obtained.

Yield : 75%.  $^1\text{H}$  NMR ( $\text{CDCl}_3$ , 300 MHz):  $\delta$  5.47 (s, 1H), 3.24 (q, 2H,  $J = 6.9$  Hz), 2.53 (t, 2H,  $J = 7$  Hz), 2.17 (t, 2H,  $J = 7.5$  Hz), 1.6-1.77 (m, 4H), 1.49 (t, 2H,  $J = 6$  Hz), 1.27-1.4 (m, 10H), 0.87 (t, 3H,  $J = 6.3$  Hz).  $^{13}\text{C}$  NMR ( $\text{CDCl}_3$ ): 172.55, 39.7, 36.26, 33.64, 31.9, 29.8, 29.4, 29.3, 27, 24.5, 24.4, 22.7, 14.2. IR spectra ( $\text{cm}^{-1}$ ): 1645, 1553 (amide stretching & bending). ESI-MS (+ve ion mode, MeOH)  $m/z = 246.1$  (30%) [ $\text{MH}^+$ ], 268.1 (100%) [ $\text{MNa}^+$ ].

## SI 4. Copy of spectra –

### N-(4-Azidobutyl)phthalimide

#### ESI-MS

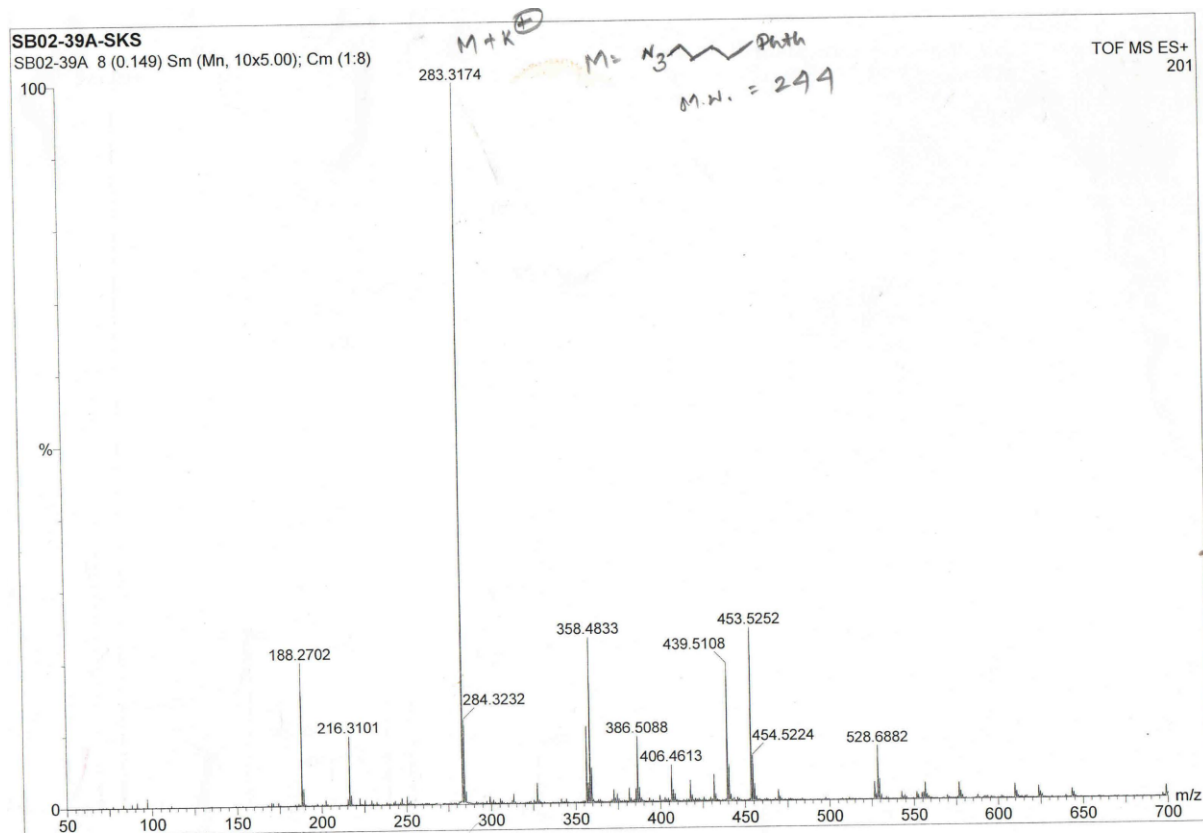

## N-(8-Azidooctyl)phthalimide

### ESI-MS

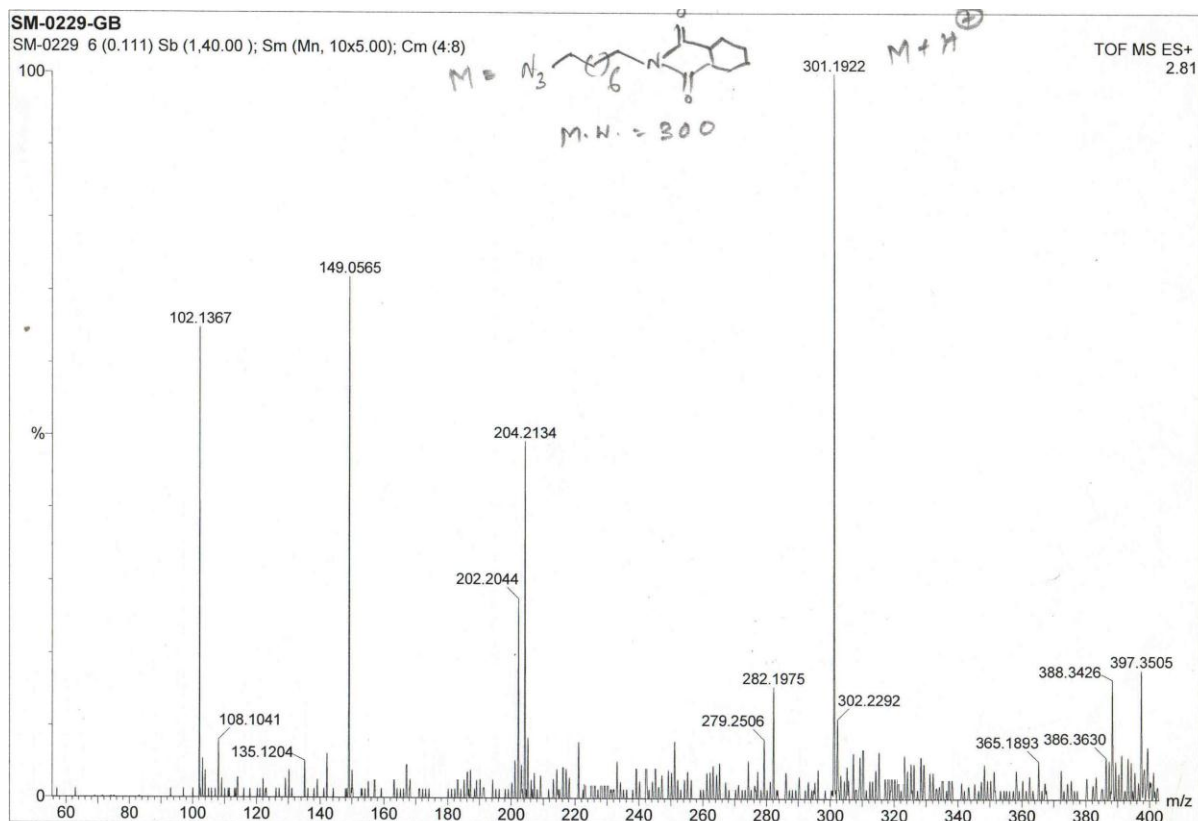

# 1-Azidoundecanethiol

$^1\text{H}$  NMR ( $\text{CDCl}_3$ )

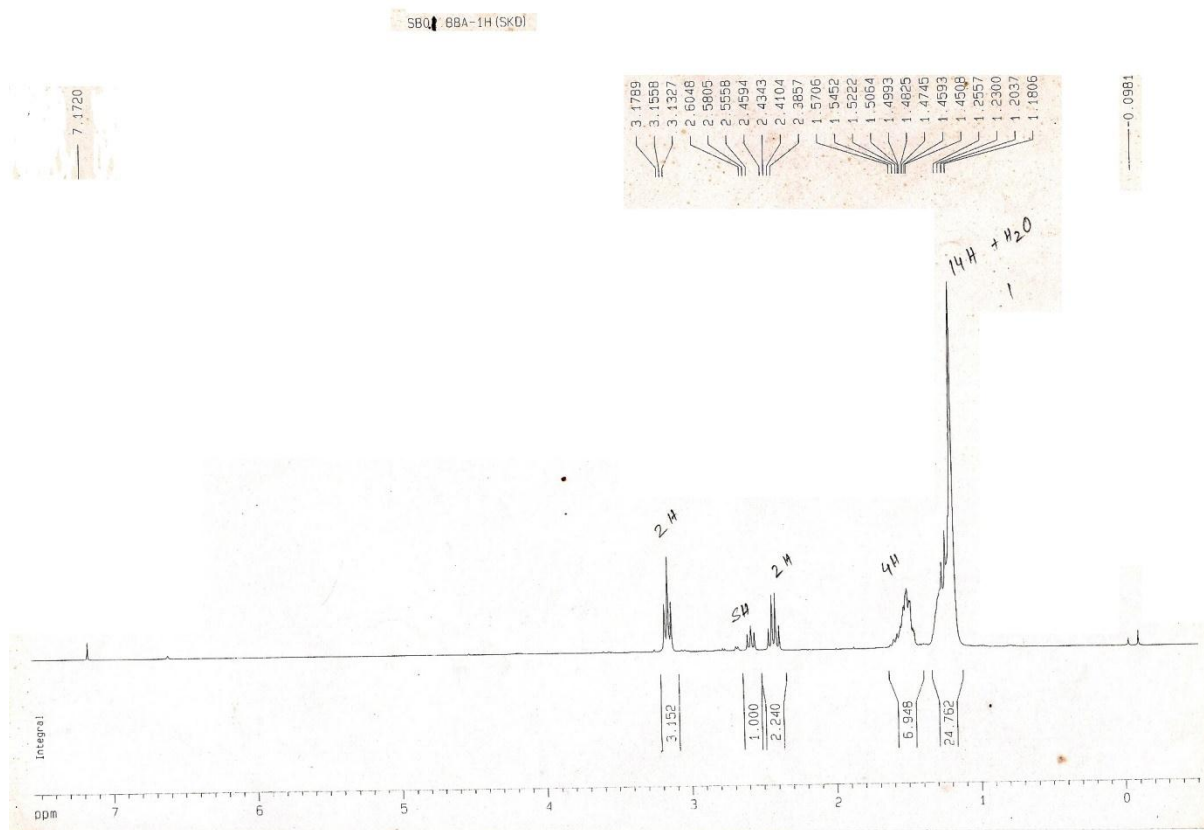

# $^{13}\text{C}$ NMR

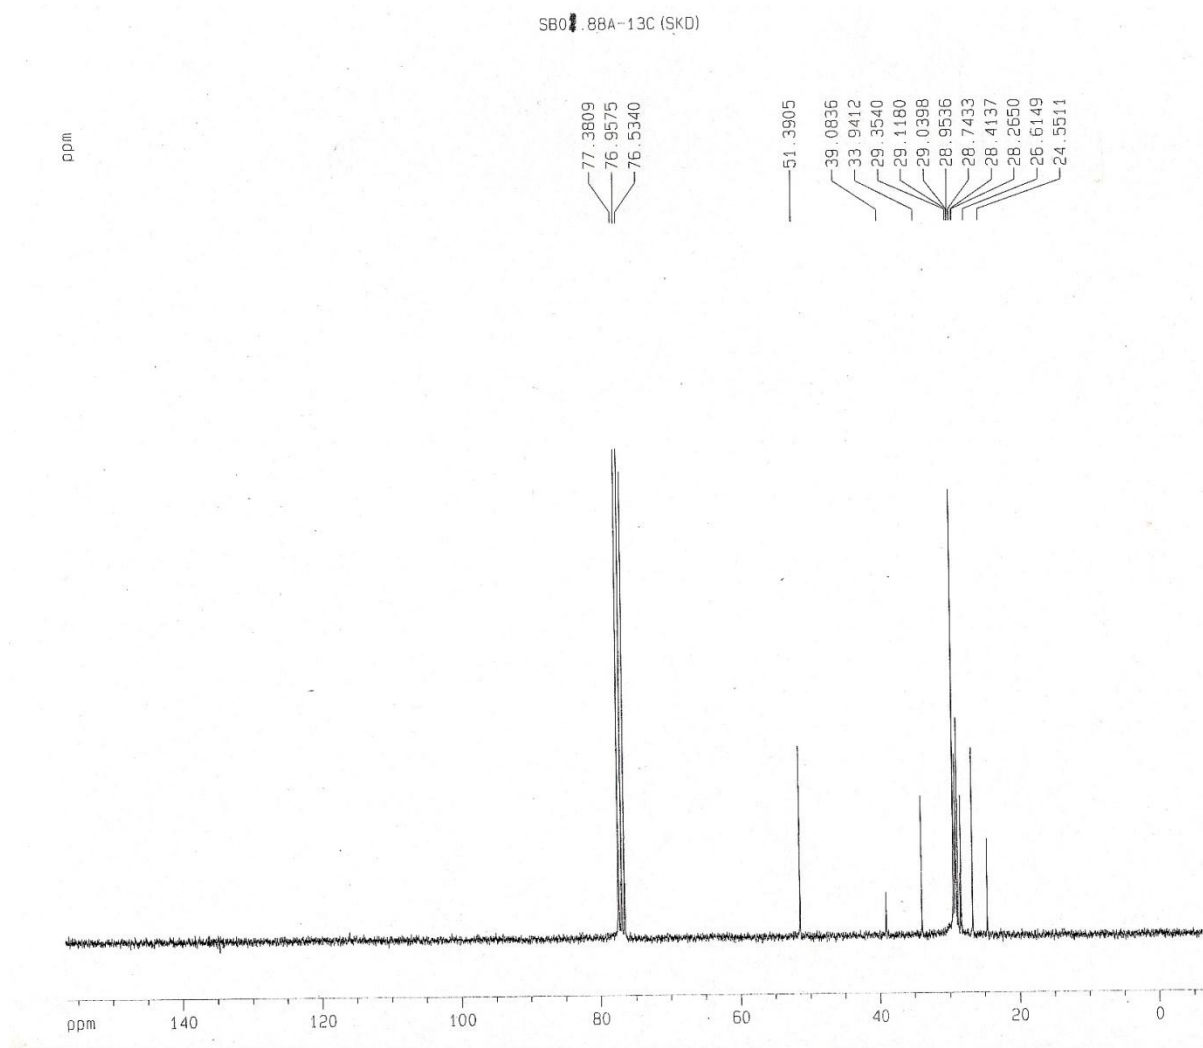

# 1-Azidoethylamine

$^1\text{H}$  NMR ( $\text{CDCl}_3$ )

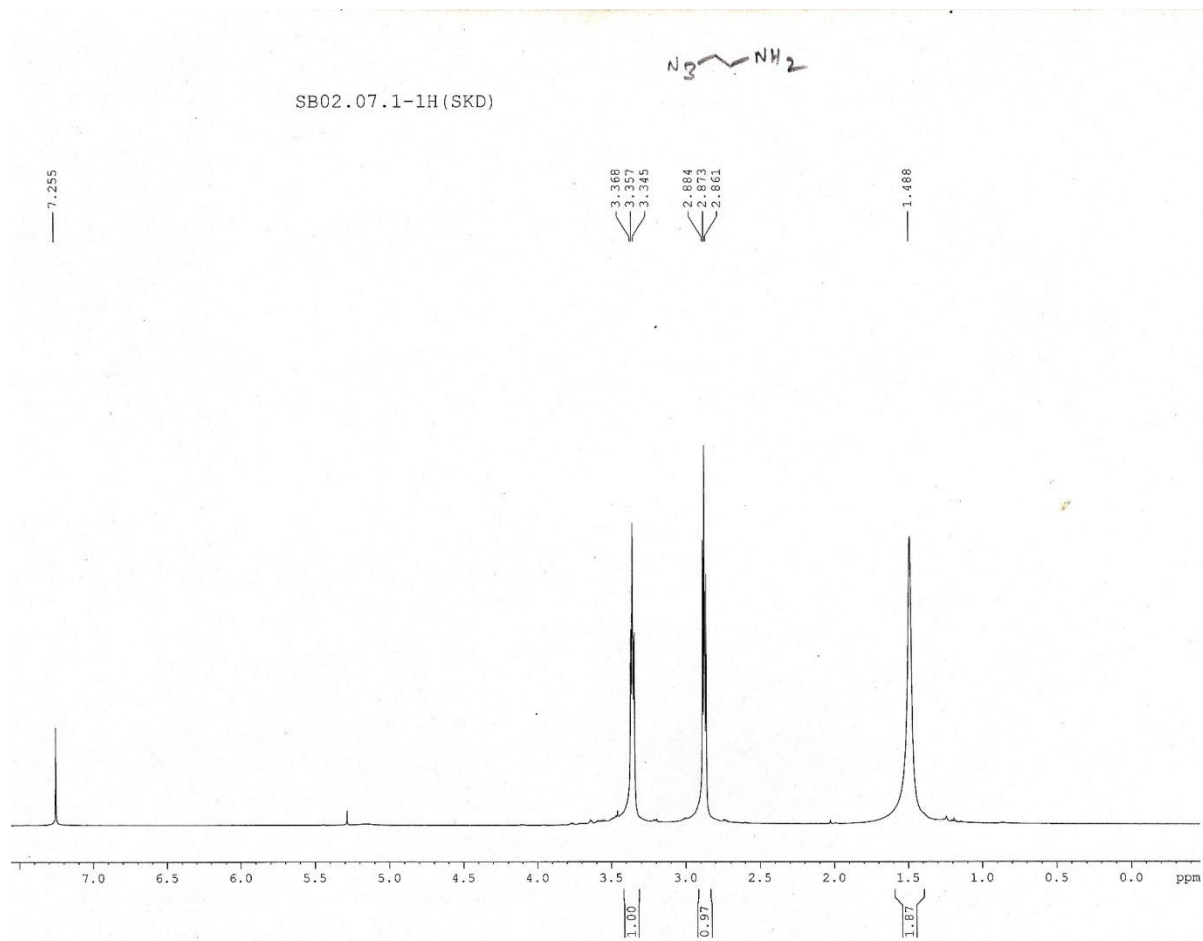



# $^{13}\text{C}$ NMR

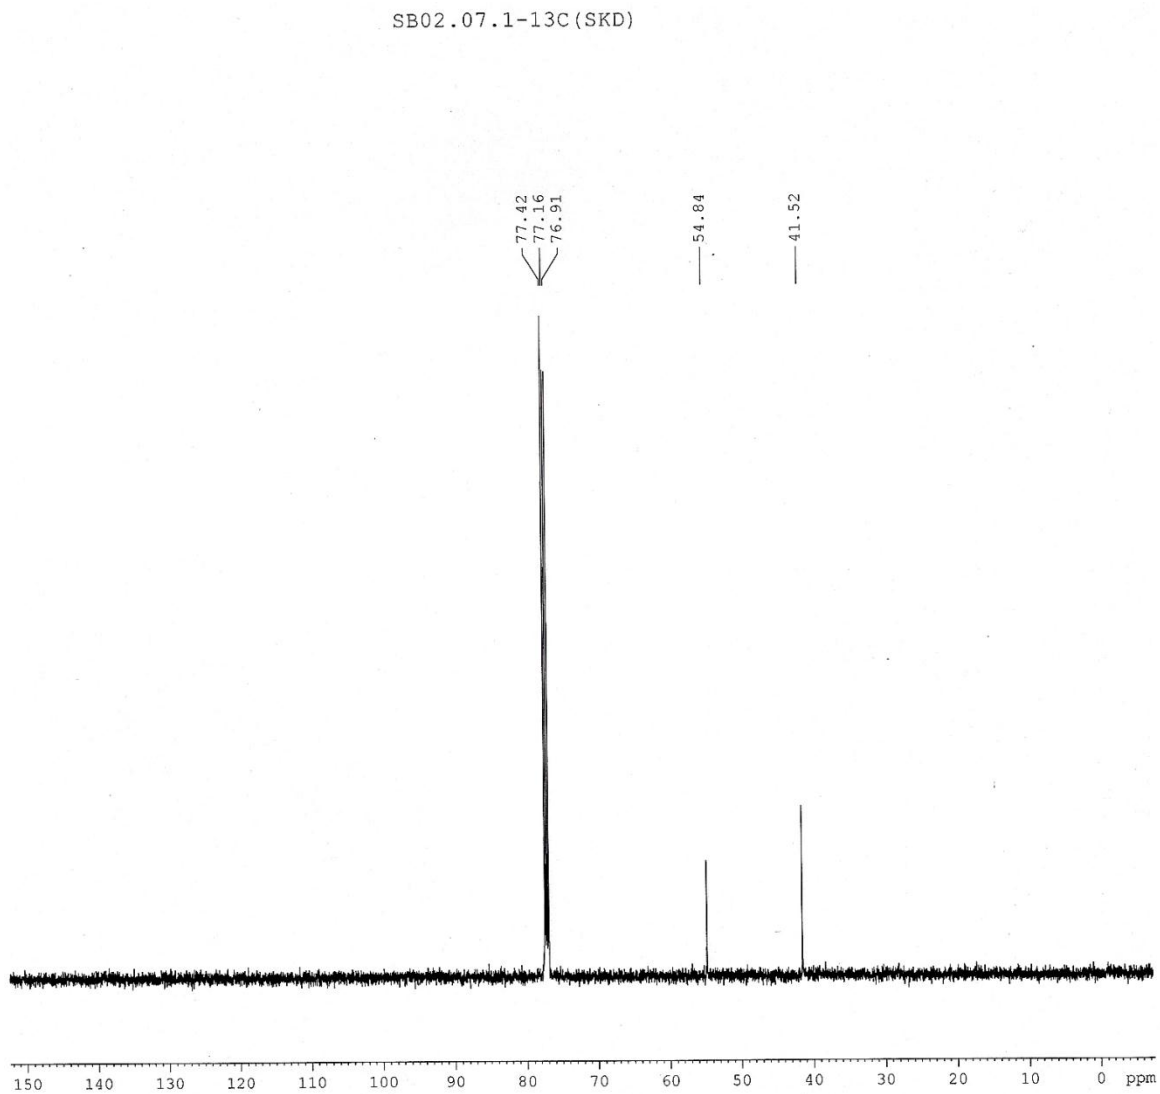

# 1-Azidoethylamidebutylchloride

$^1\text{H}$  NMR ( $\text{CDCl}_3$ )

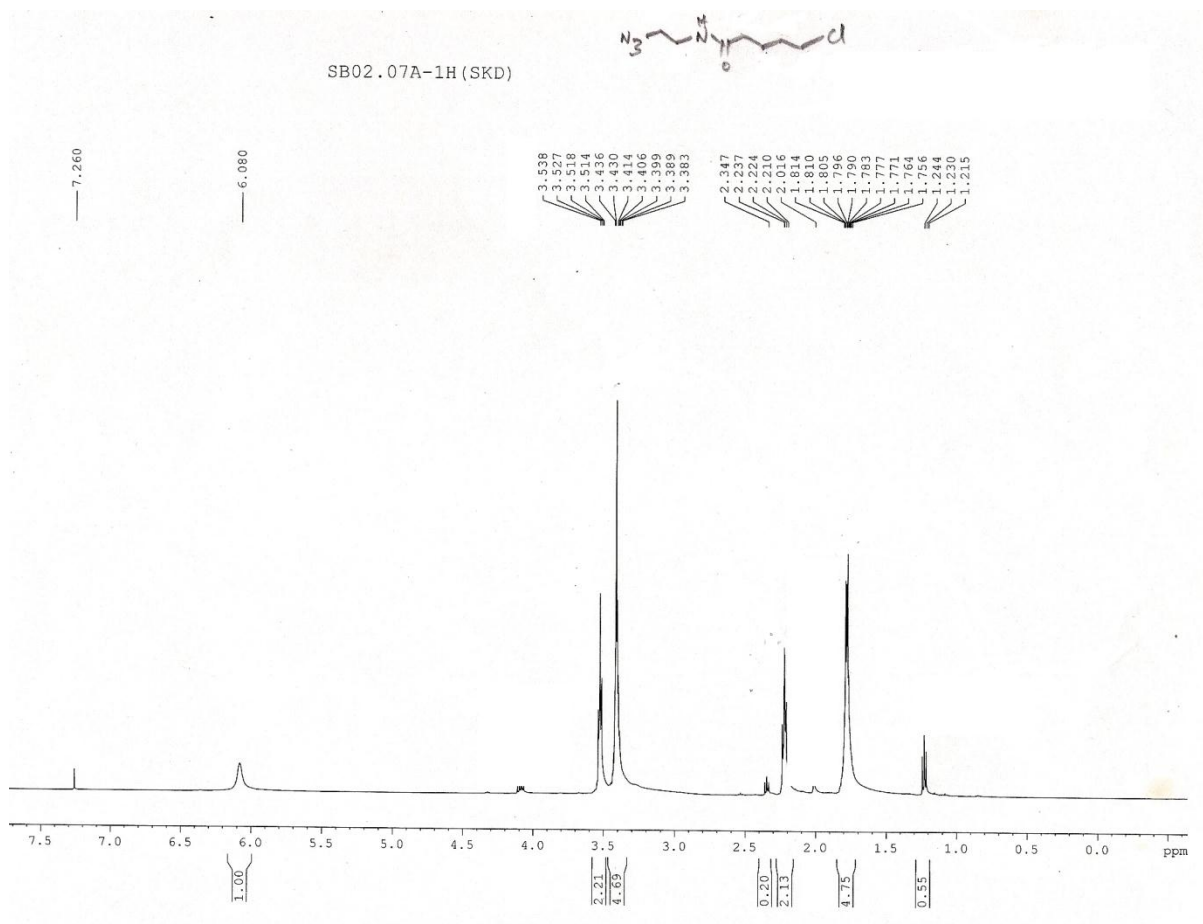

$^{13}\text{C}$  NMR

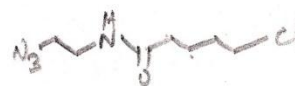

SB02.07A-13C (SKD)

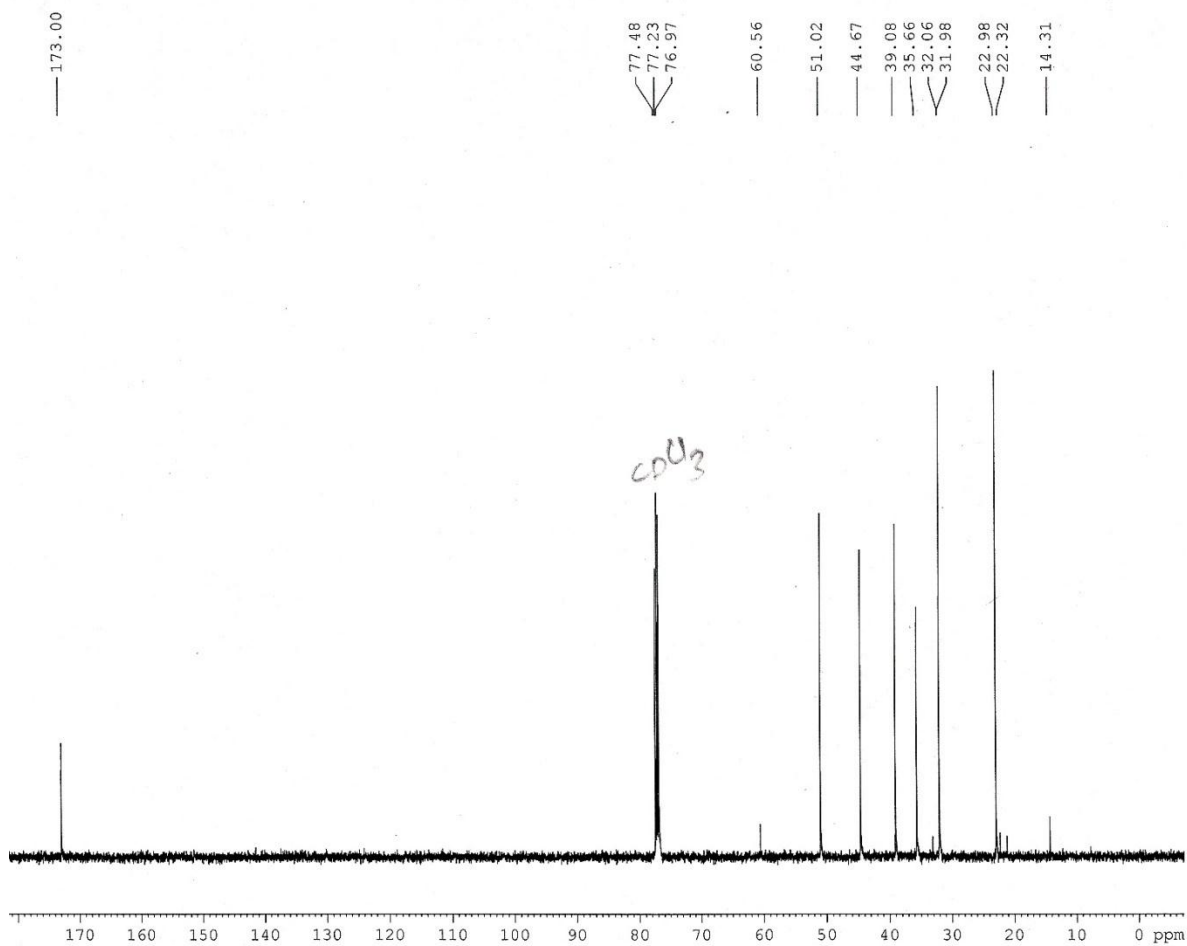

## ESI-MS

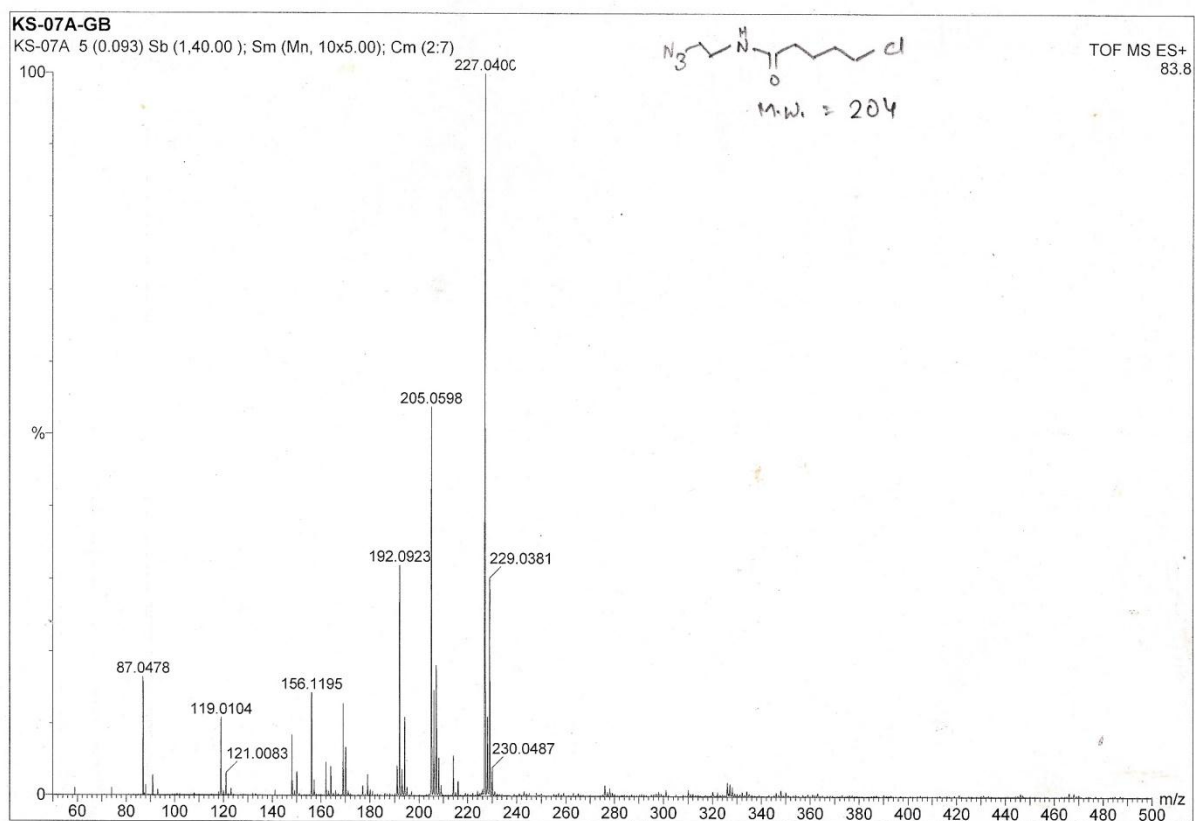

# 1-Azidoethylamidebutylthiol

$^1\text{H}$  NMR ( $\text{CDCl}_3$ )

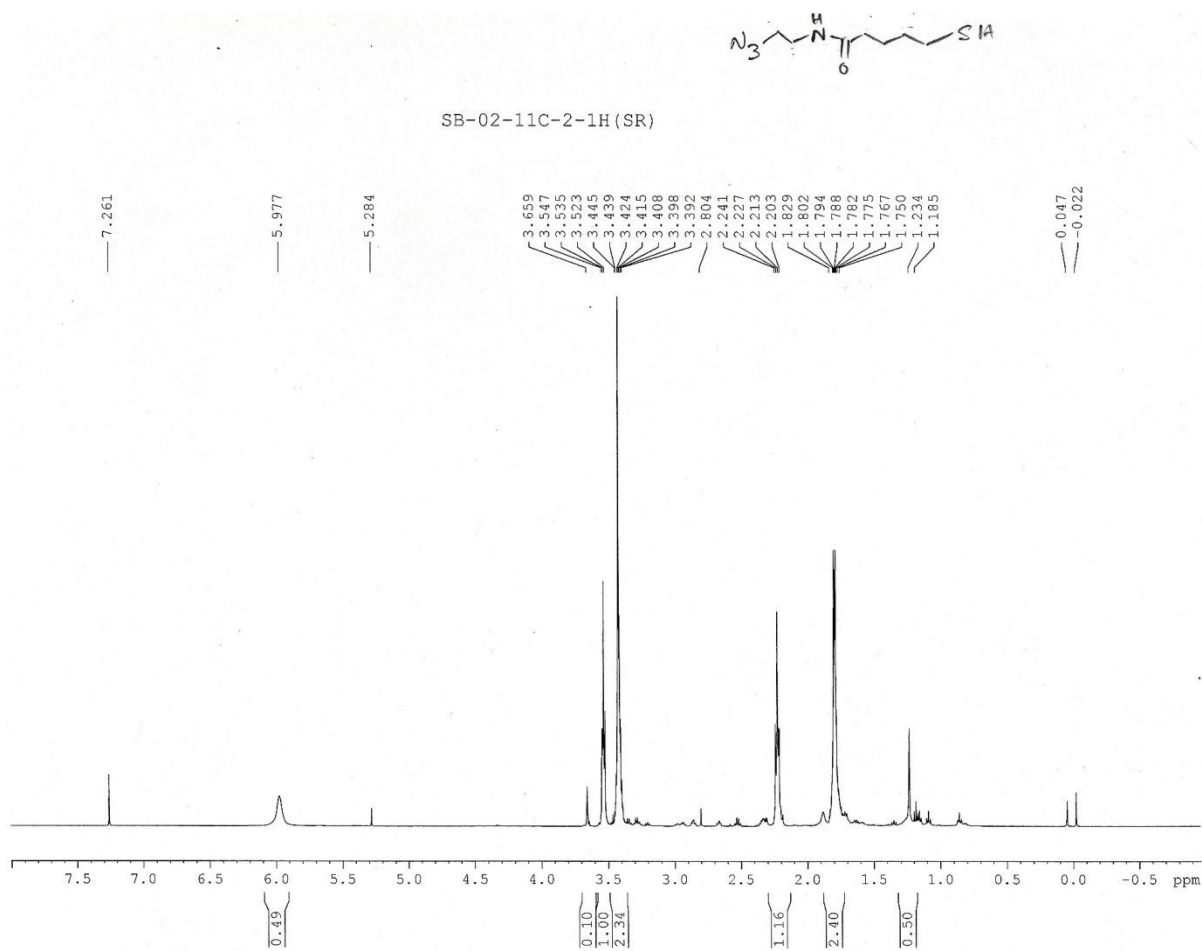

# <sup>13</sup>C NMR

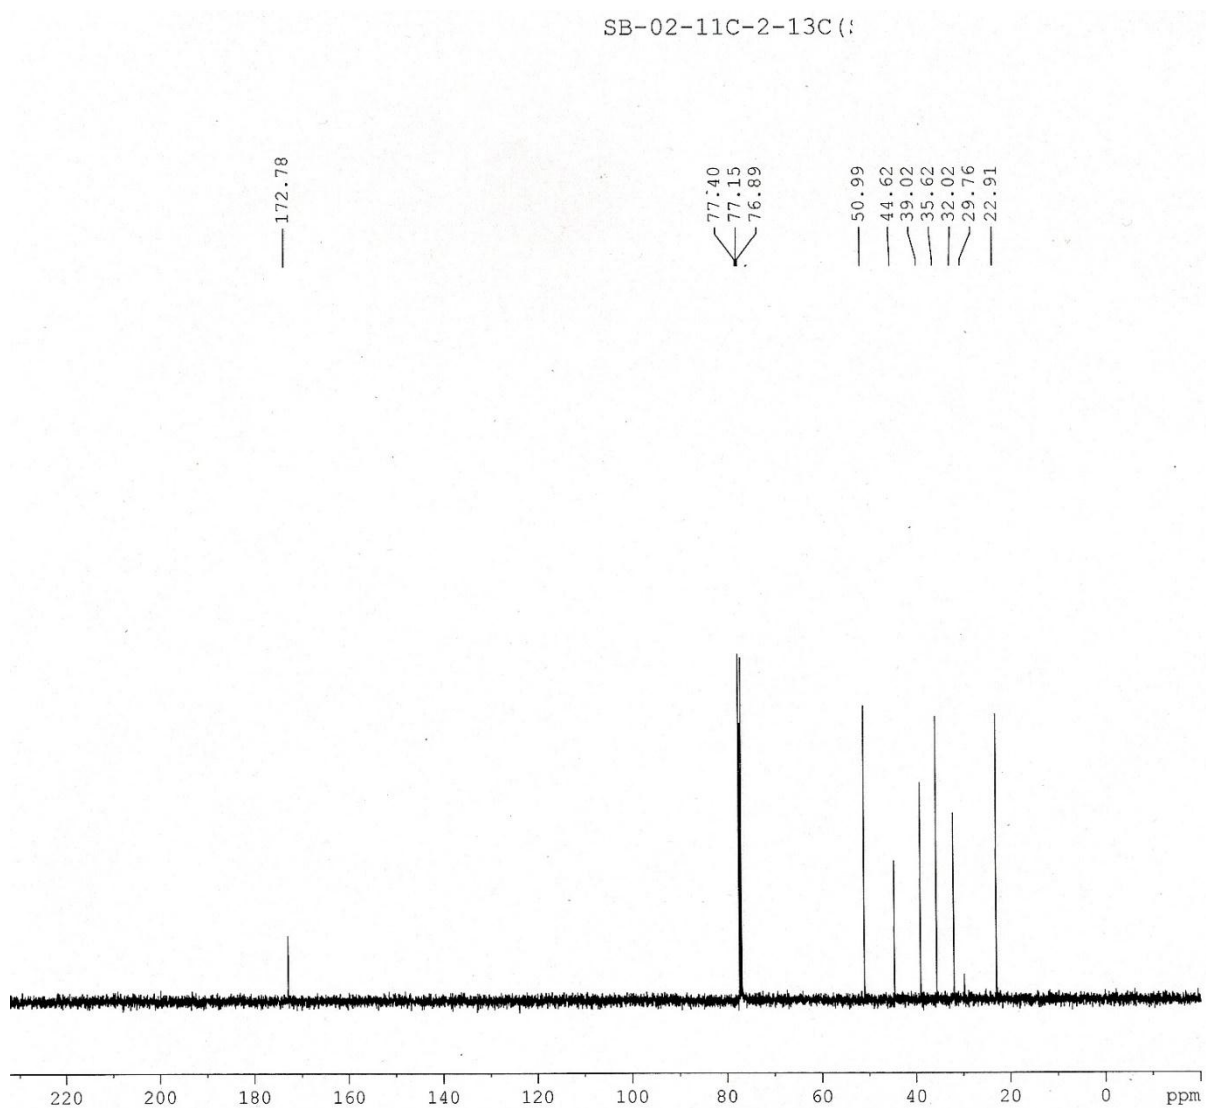

## ESI-MS

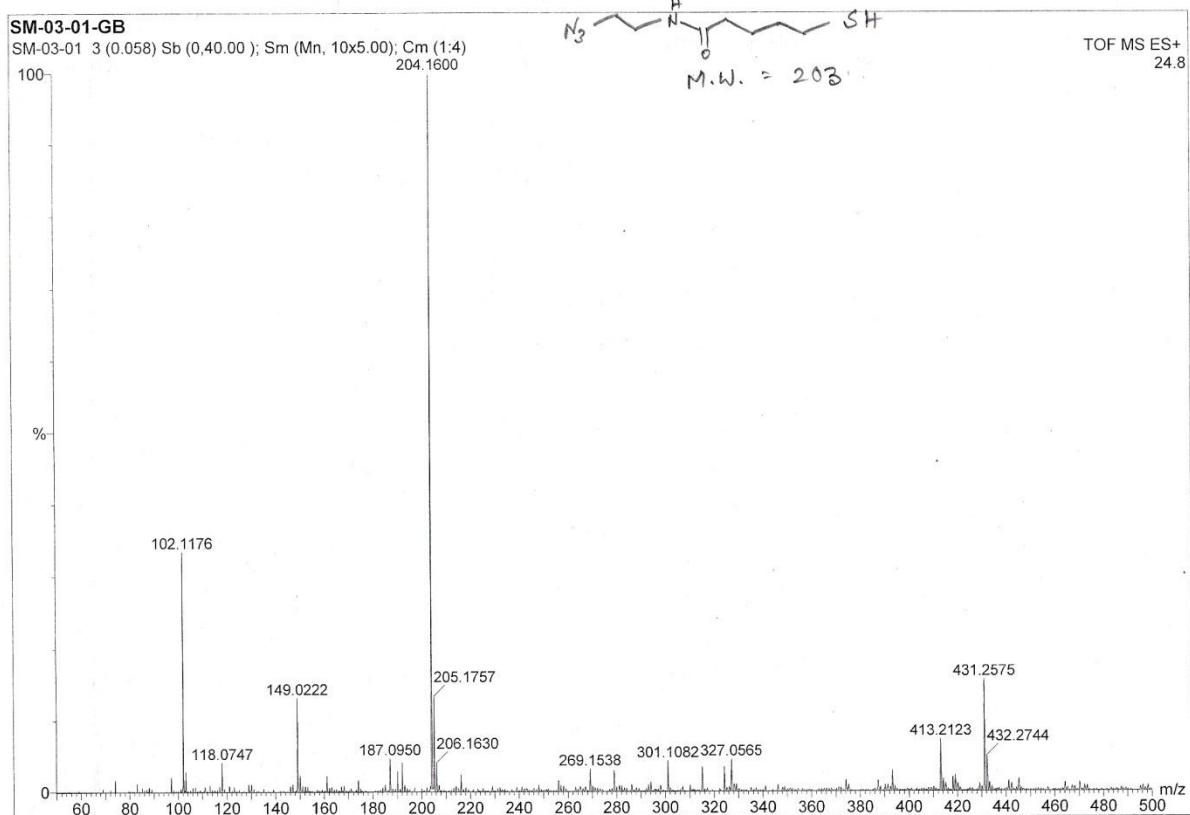

# Ethylamidebutylthiol

$^1\text{H}$  NMR ( $\text{CDCl}_3$ )

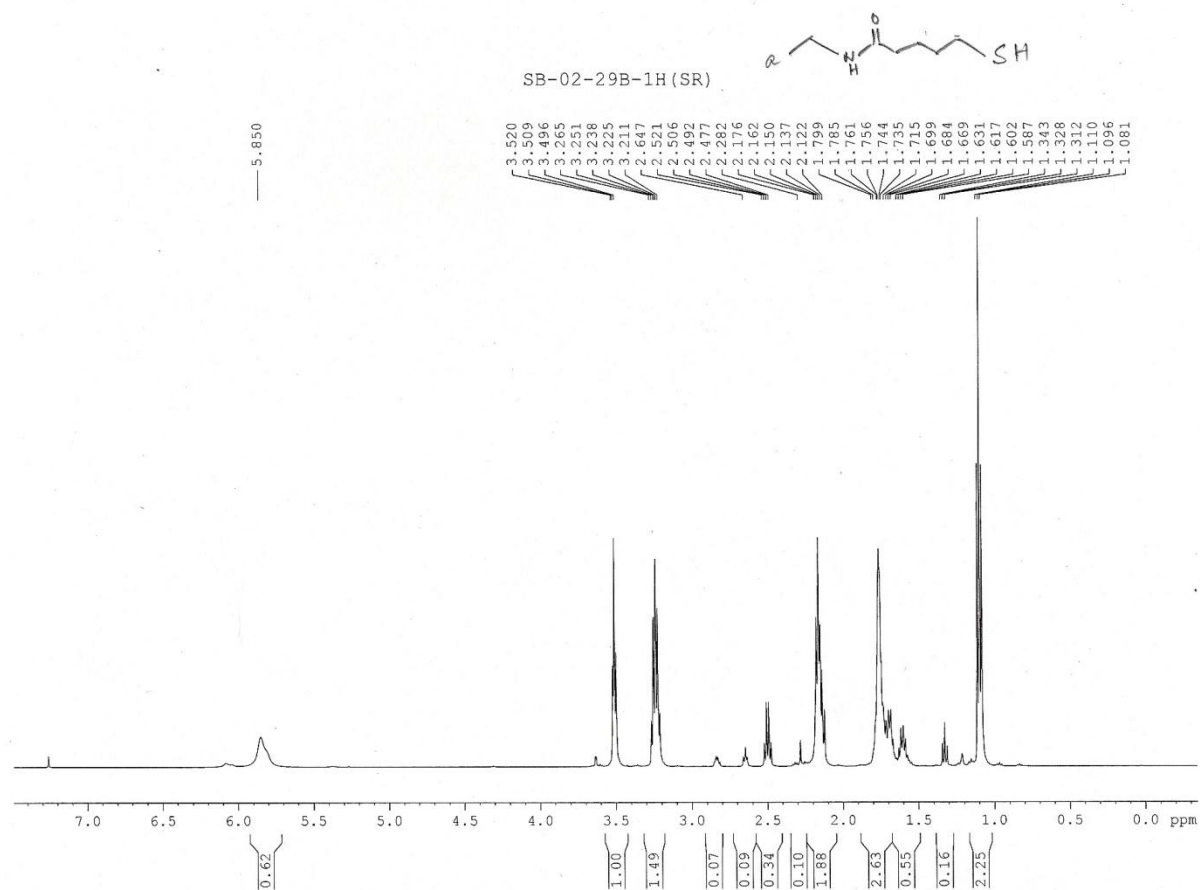



# $^{13}\text{C}$ NMR

SB-02-29B-13C (SR)

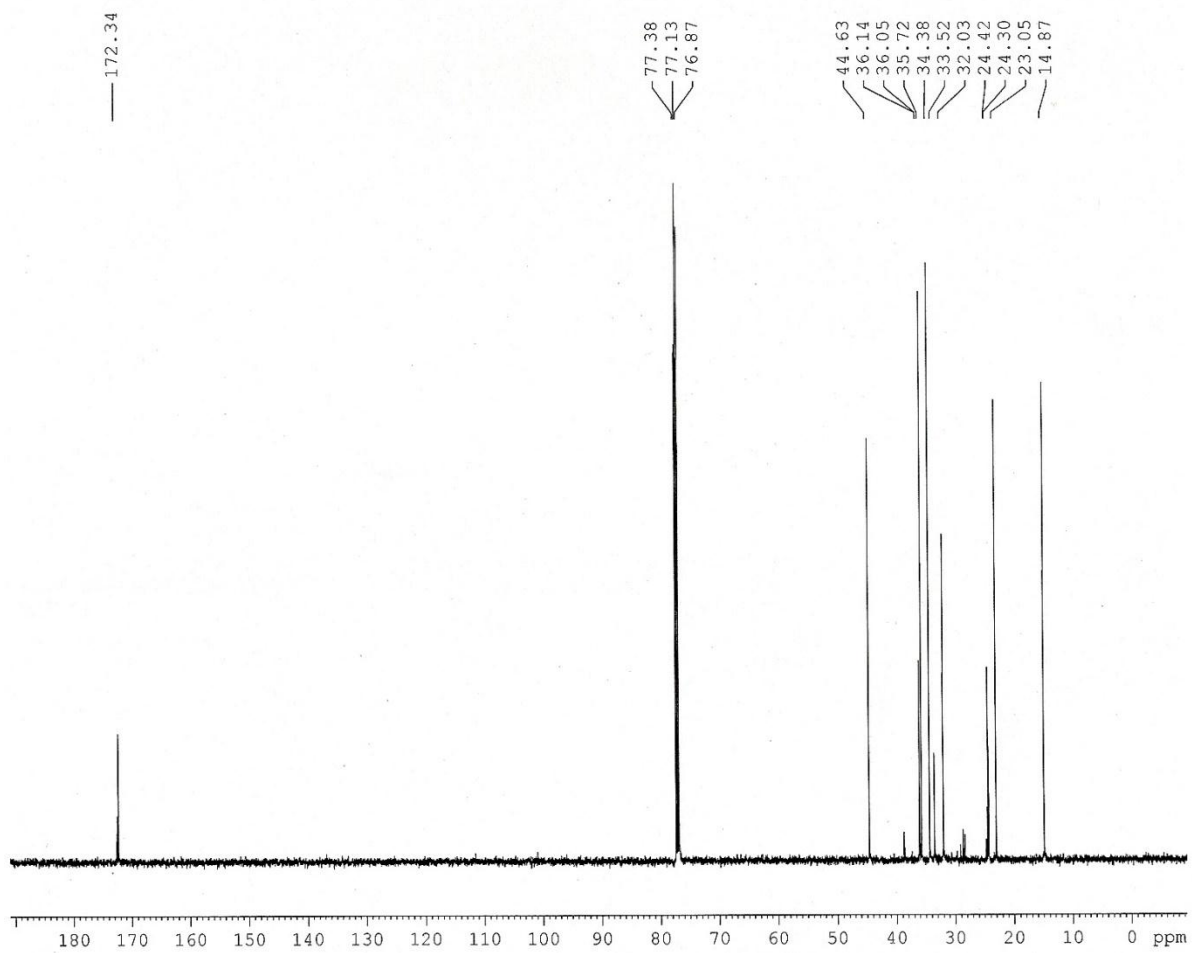

## ESI-MS

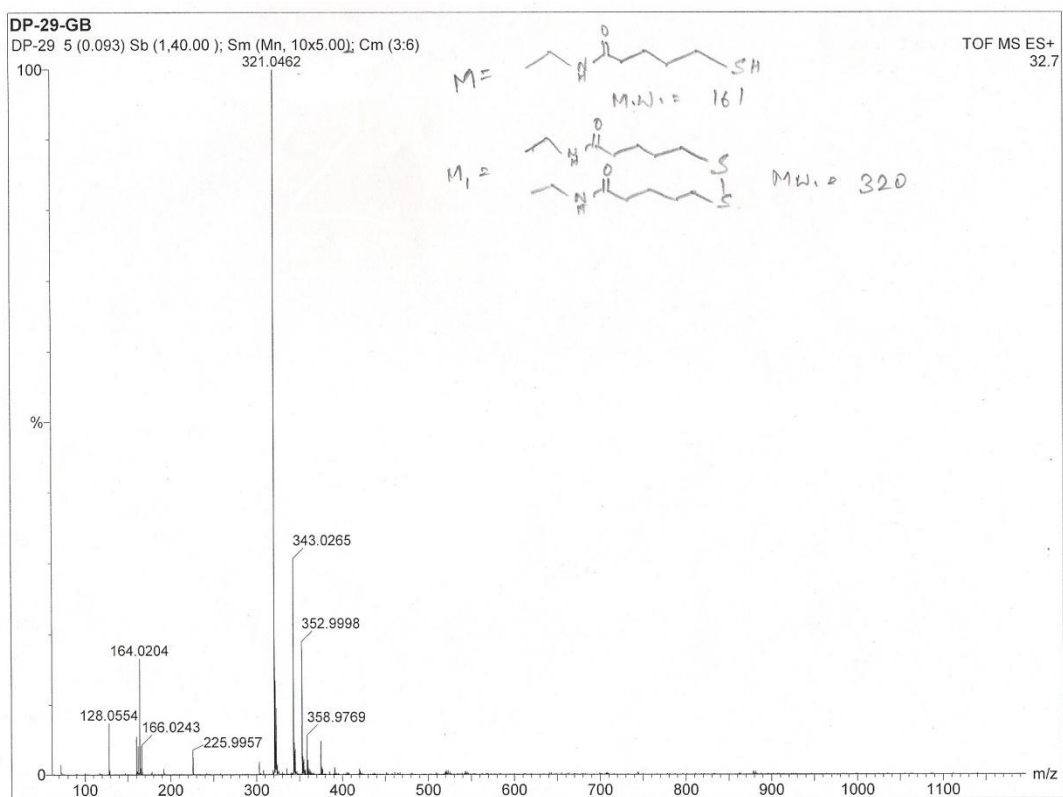

# 1-Azidobutylamine

$^1\text{H}$  NMR ( $\text{CD}_3\text{OD}$ )

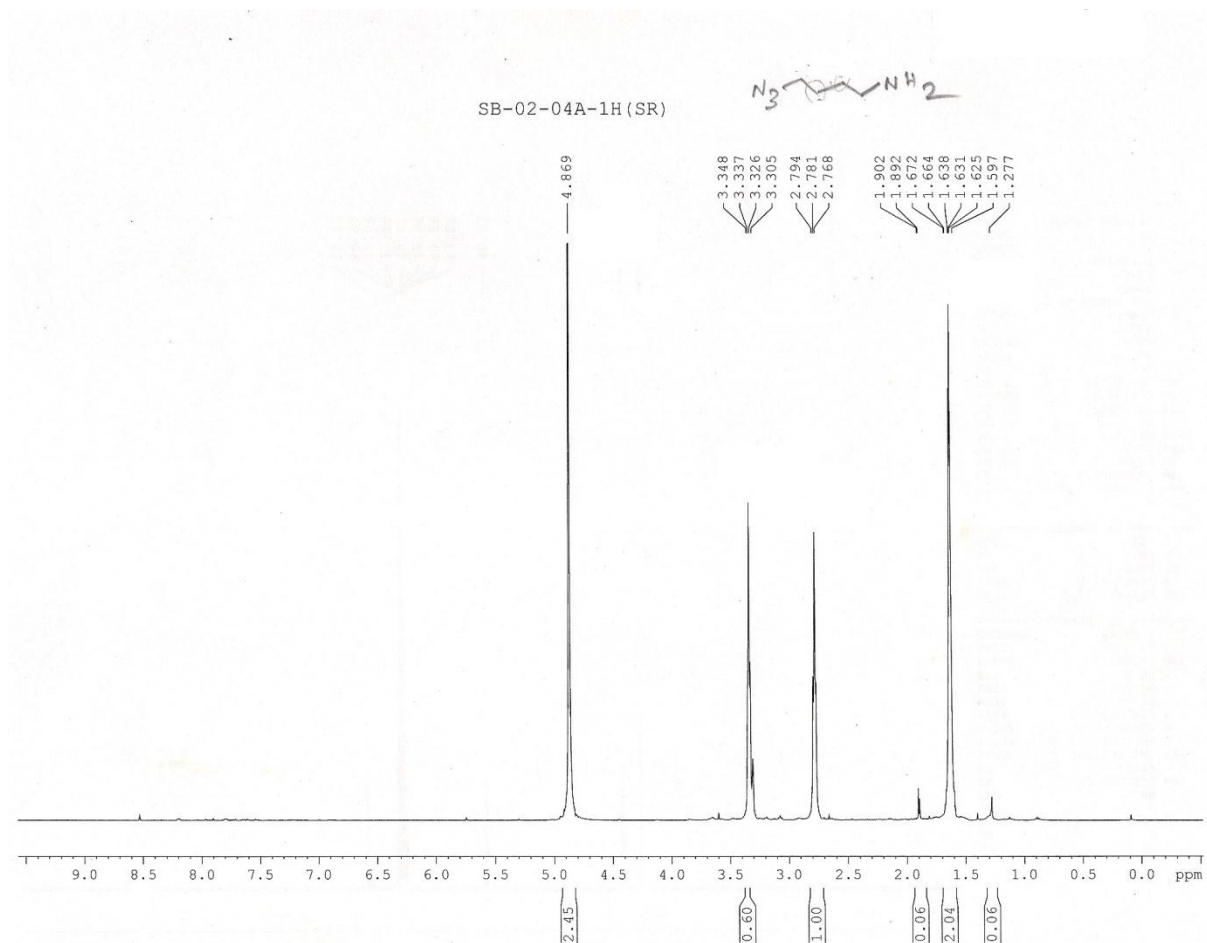

# $^{13}\text{C}$ NMR

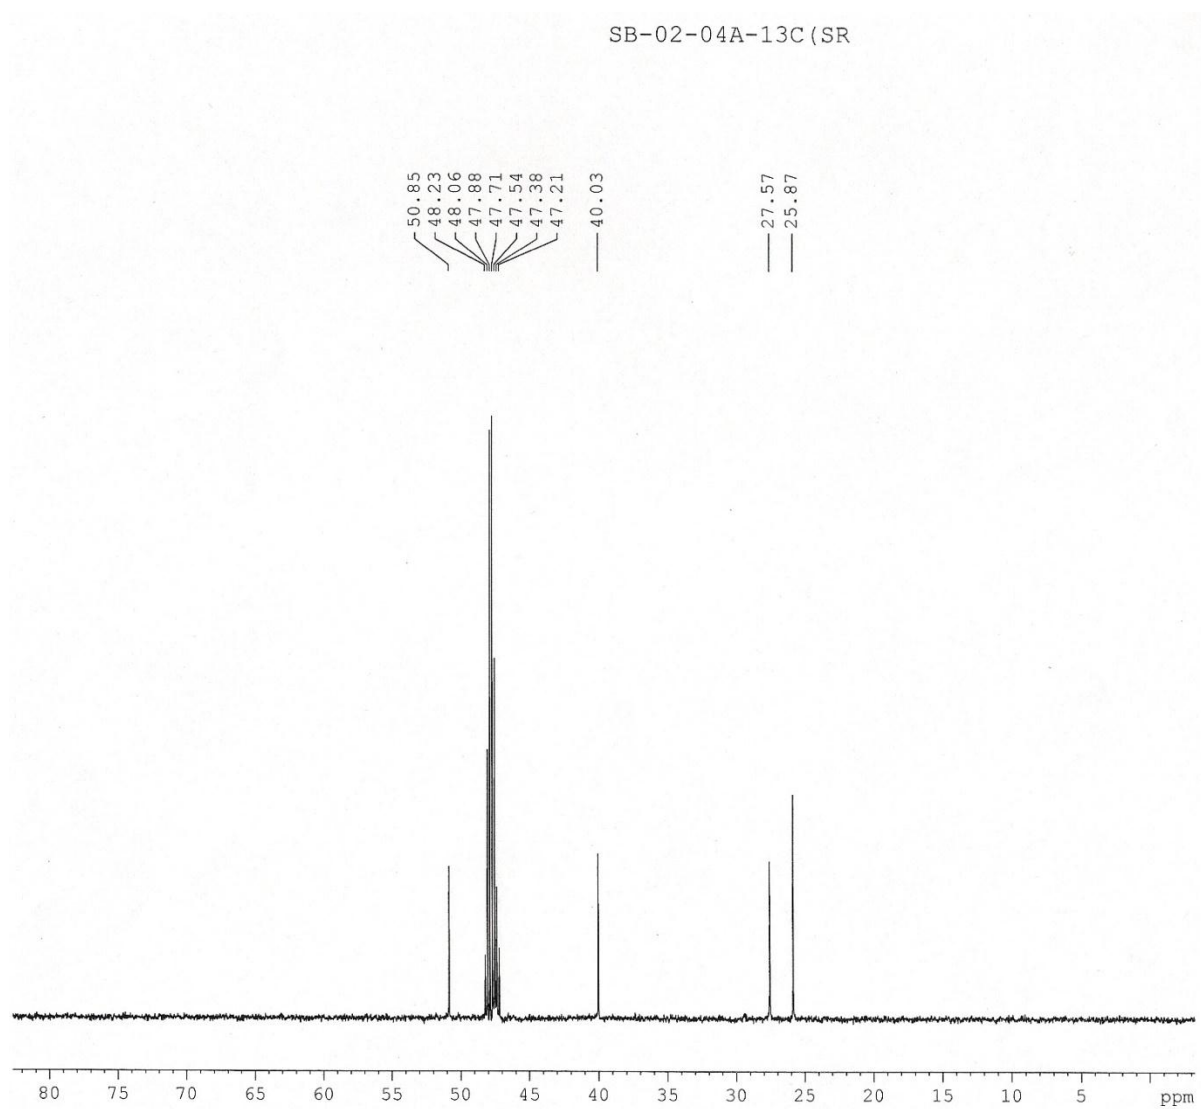

# 1-Azidobutylamidebutylchloride

$^1\text{H}$  NMR ( $\text{CDCl}_3$ )

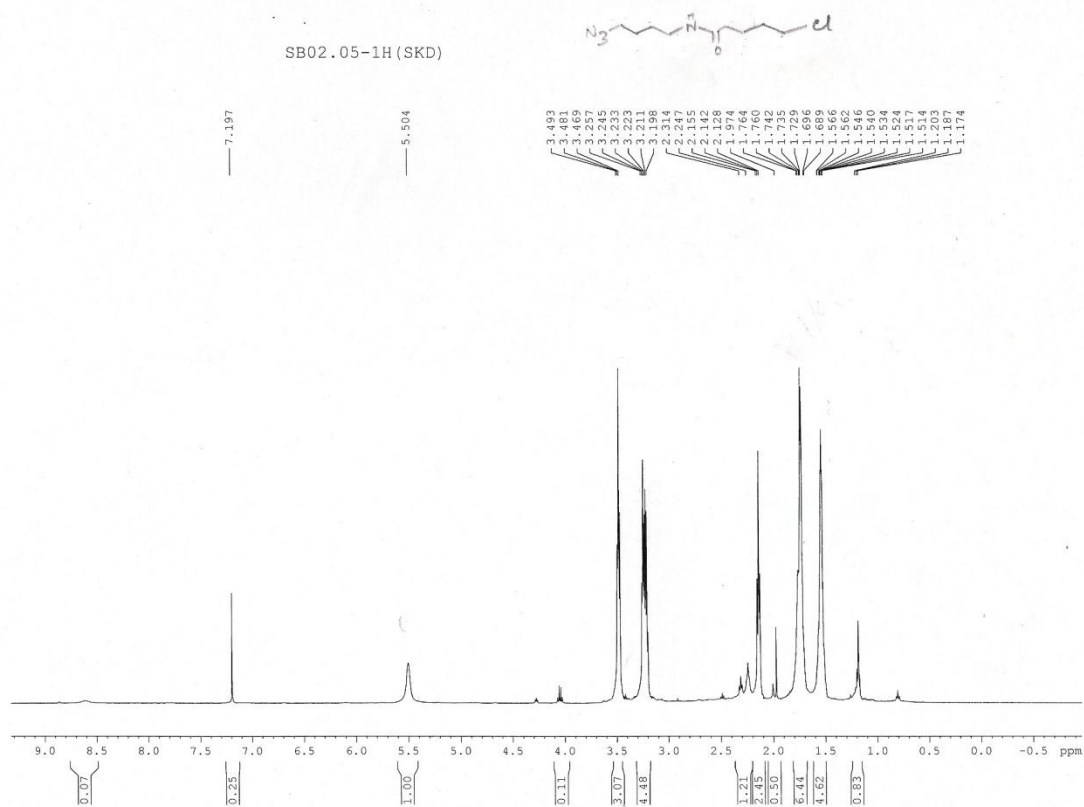

# <sup>13</sup>C NMR

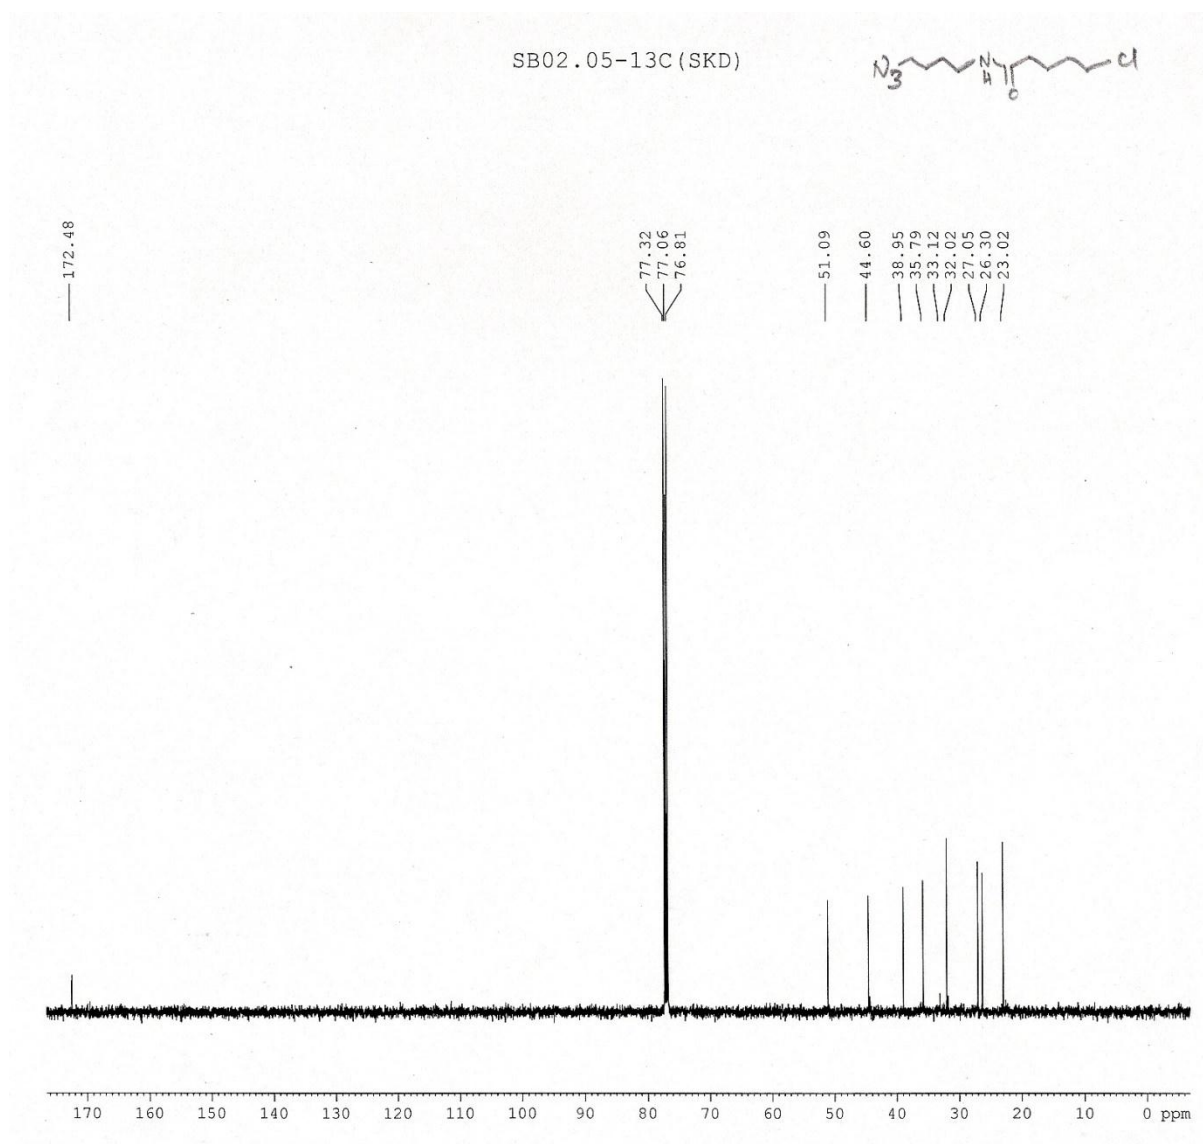

# 1-Azidobutylamidebutylthiol

$^1\text{H}$  NMR ( $\text{CDCl}_3$ )

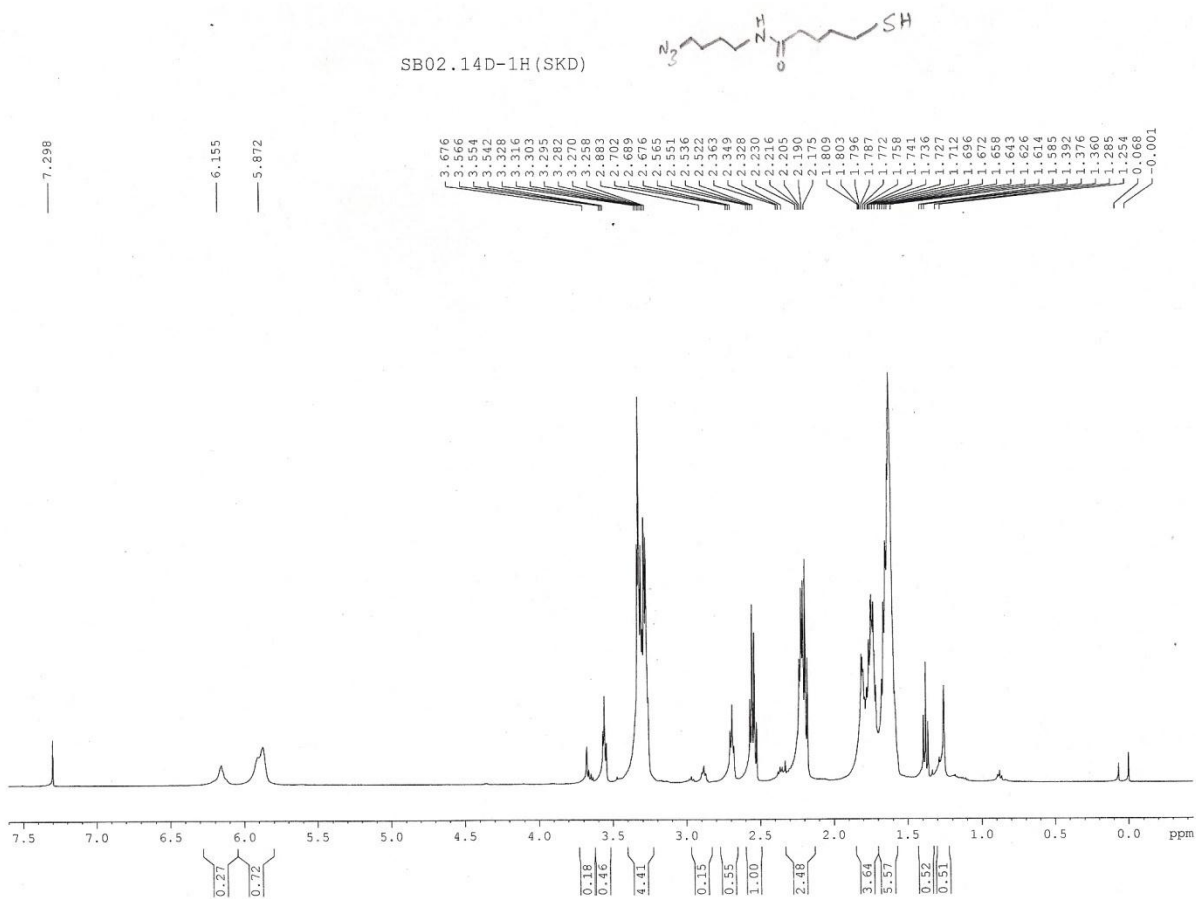

# <sup>13</sup>C NMR

SB02.14D-13C (SKD)

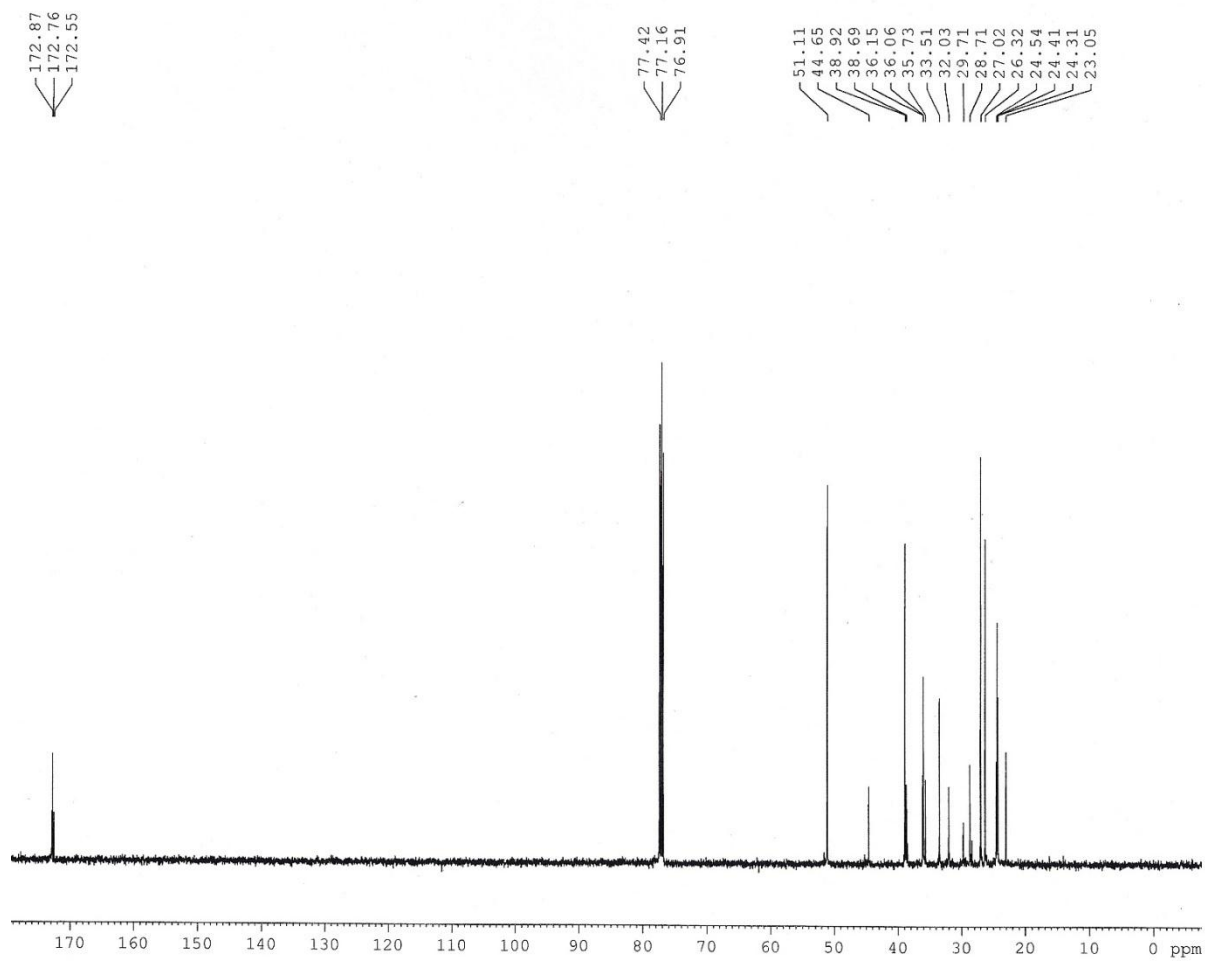



## ESI-MS

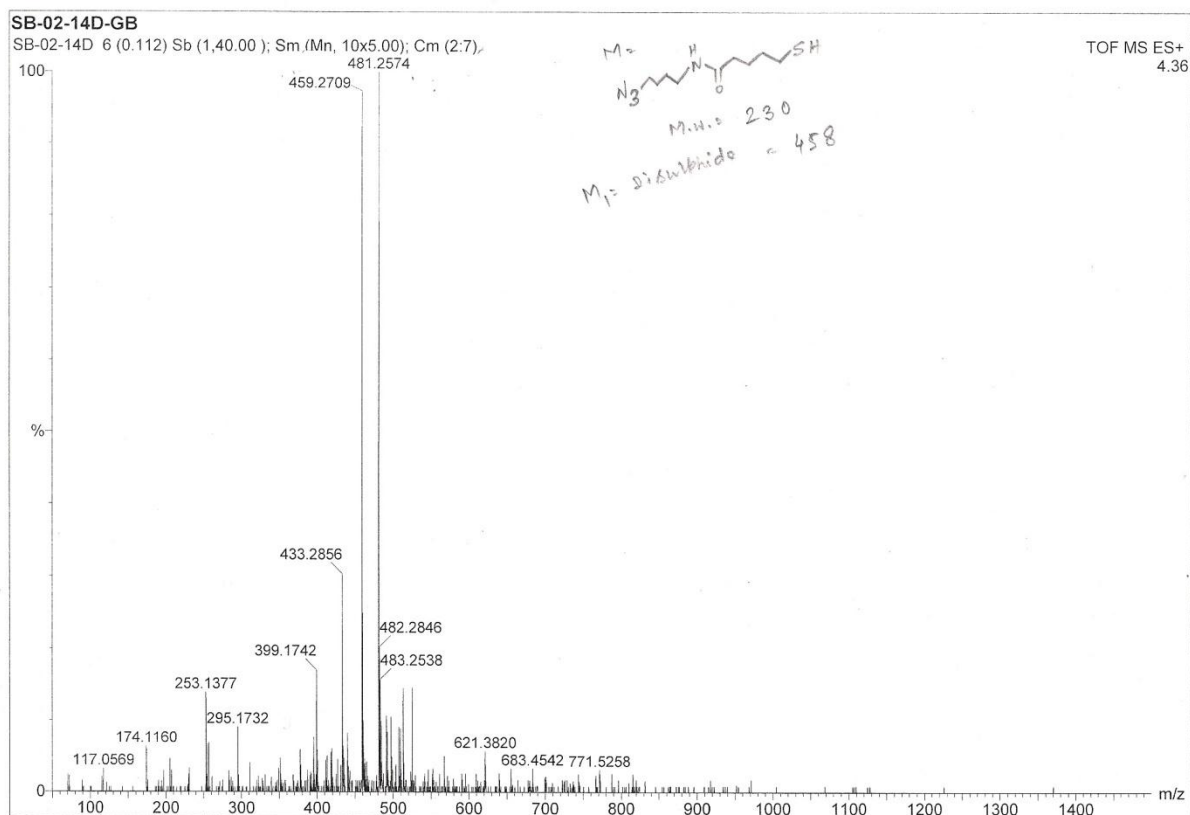

# 1-Propylamidebutylthiol

$^1\text{H}$  NMR ( $\text{CDCl}_3$ )

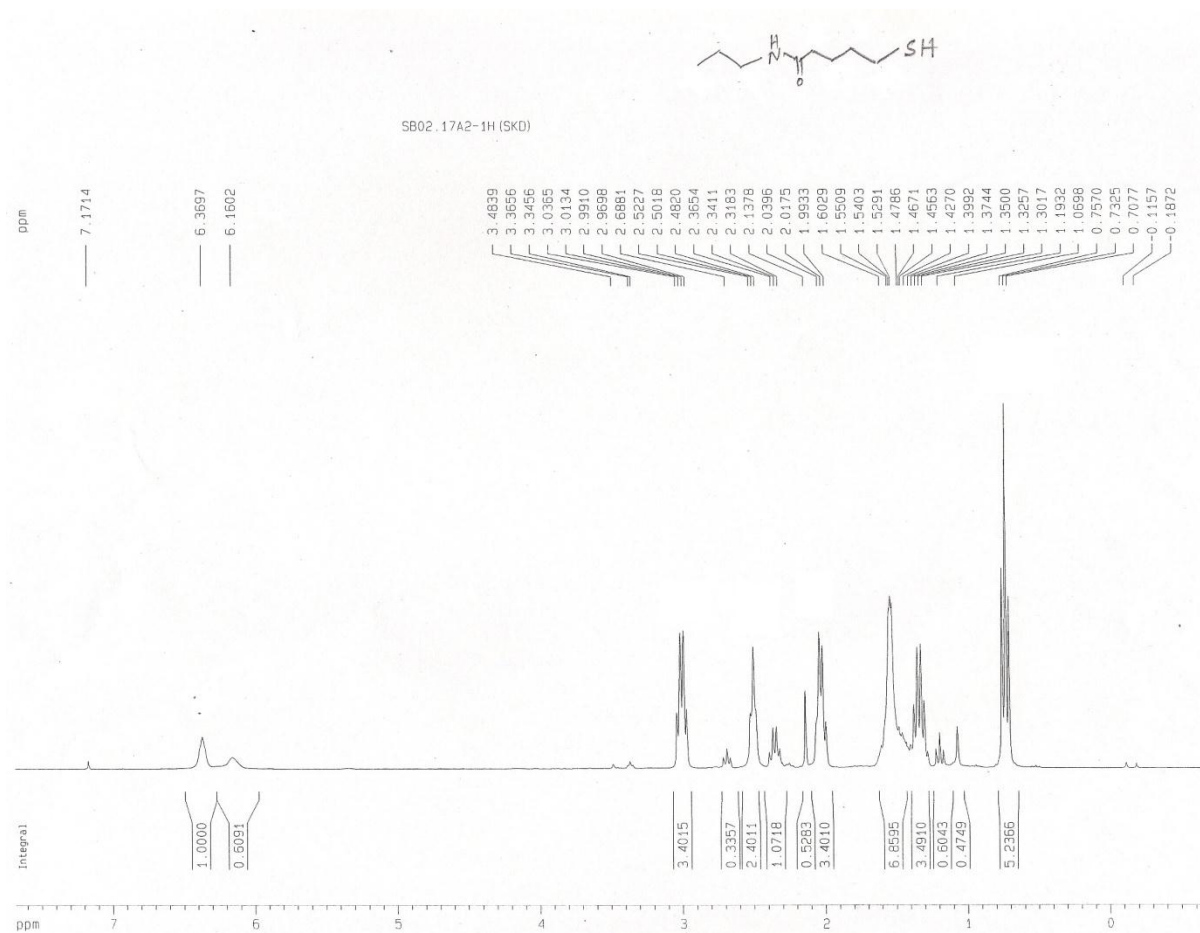

# <sup>13</sup>C NMR

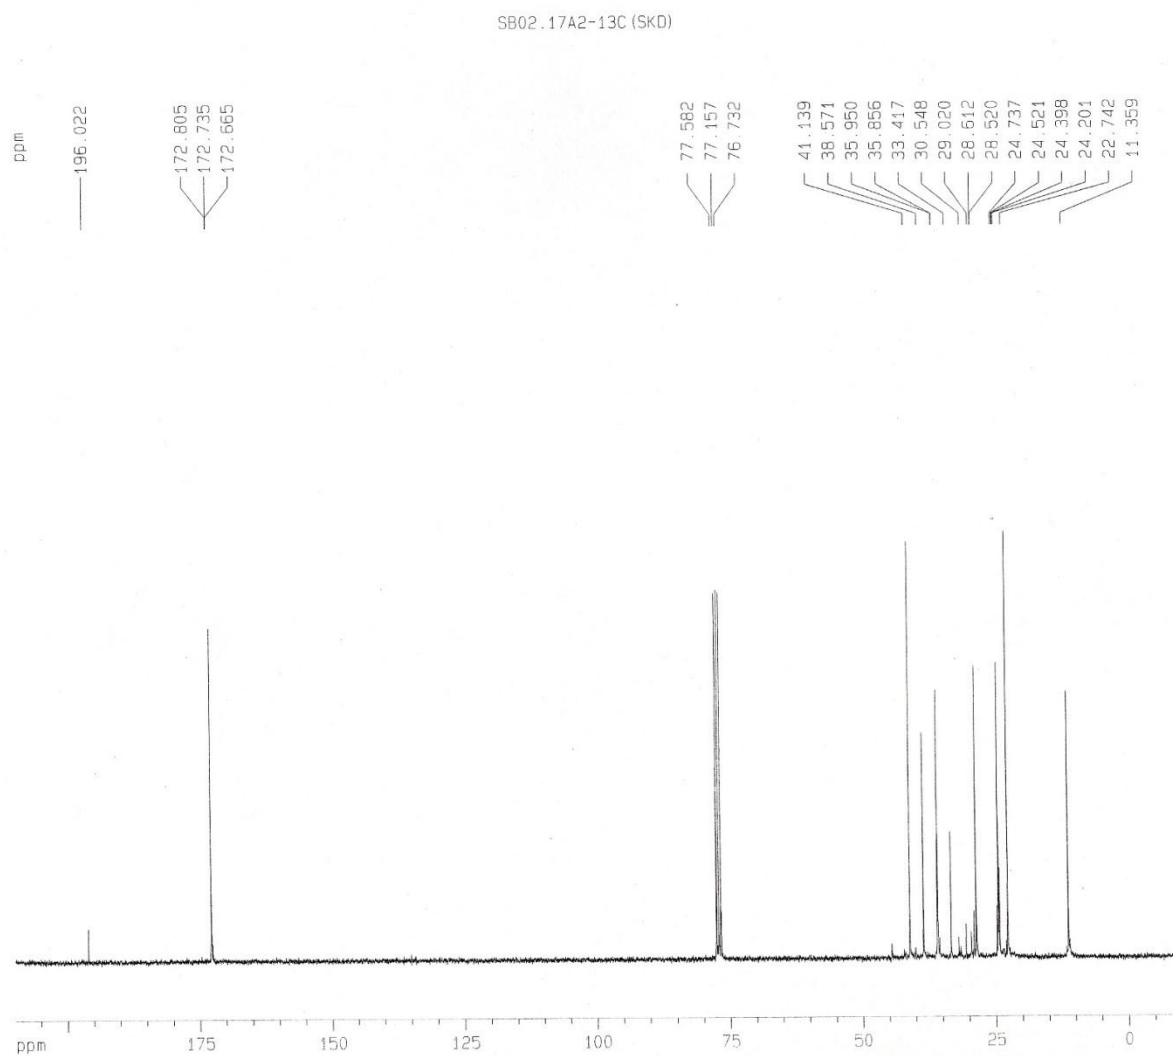

## ESI-MS

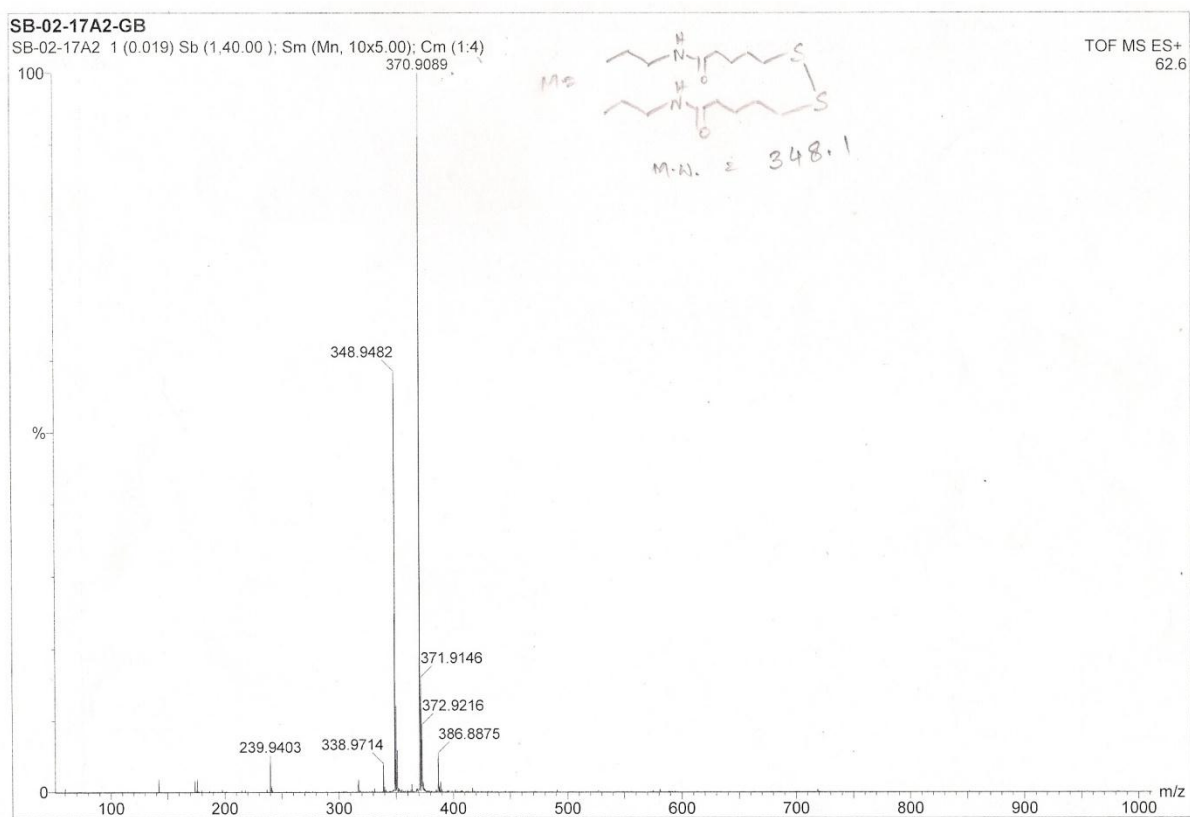

# 1-Azidoctylamine

$^1\text{H}$  NMR ( $\text{CDCl}_3$ )

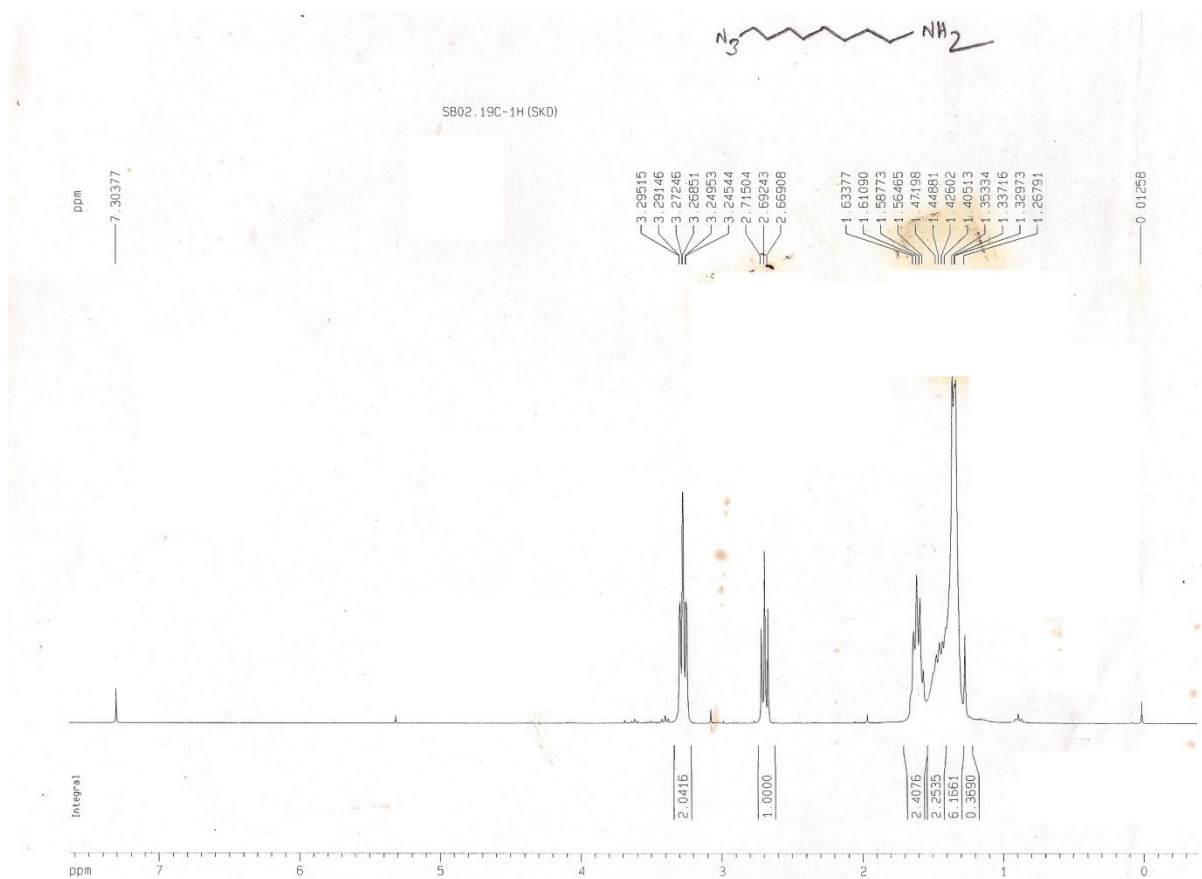

# $^{13}\text{C}$ NMR

SB02\_19C-13C (SKD)

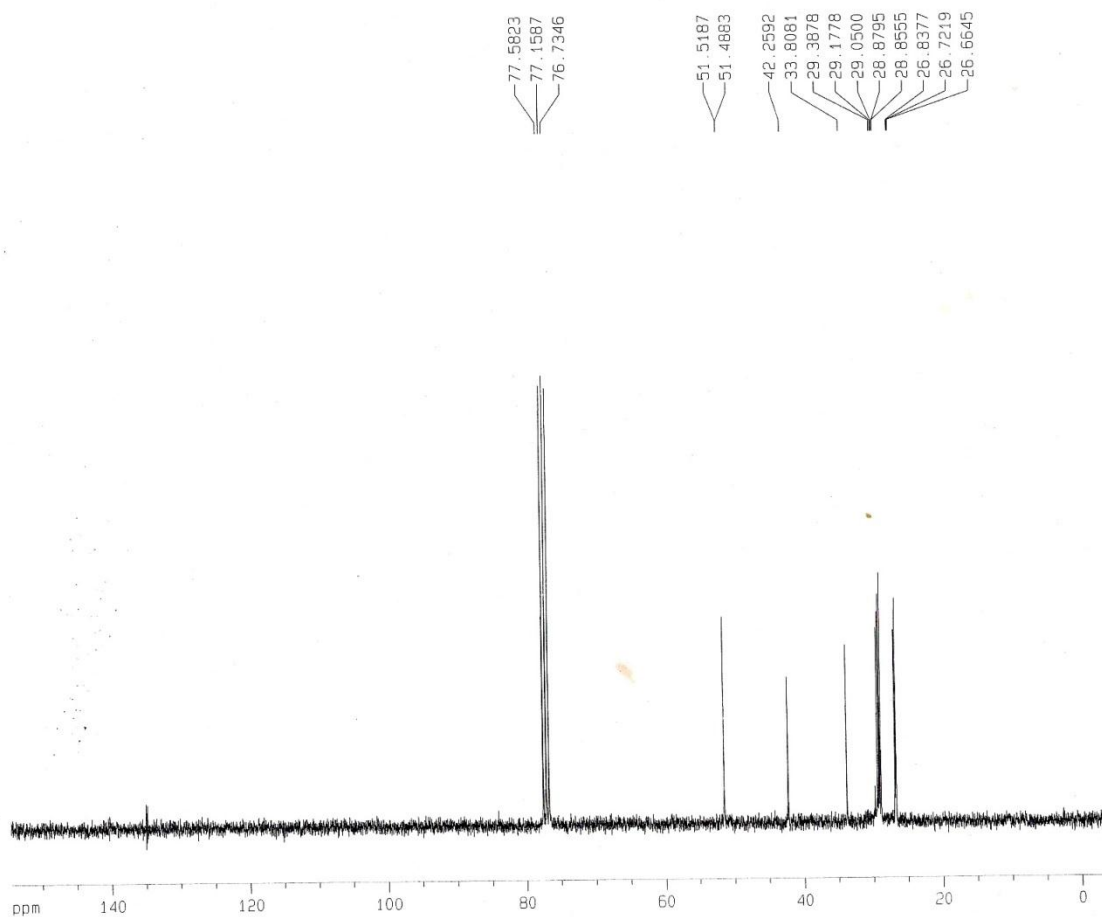

# 1-Azidoctylamidebutylchloride

$^1\text{H}$  NMR ( $\text{CDCl}_3$ )

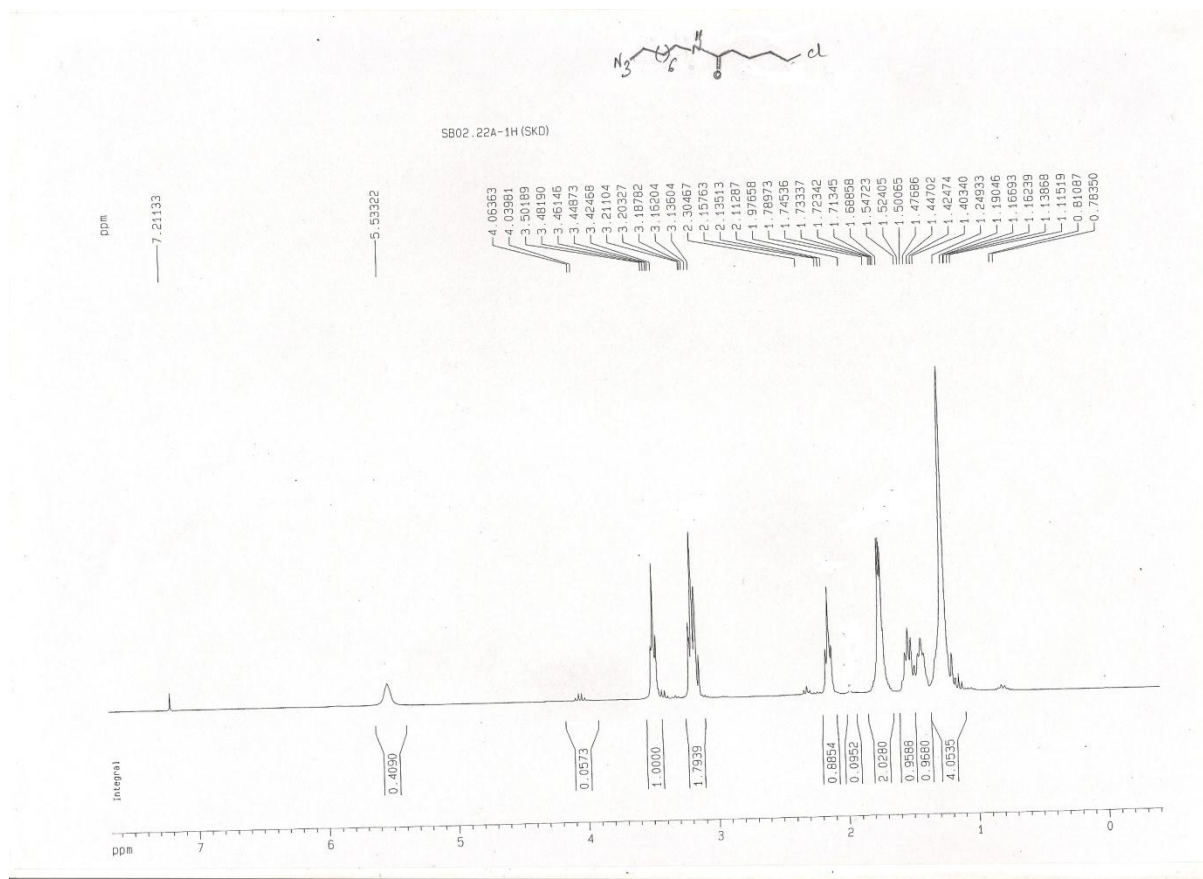

# <sup>13</sup>C NMR

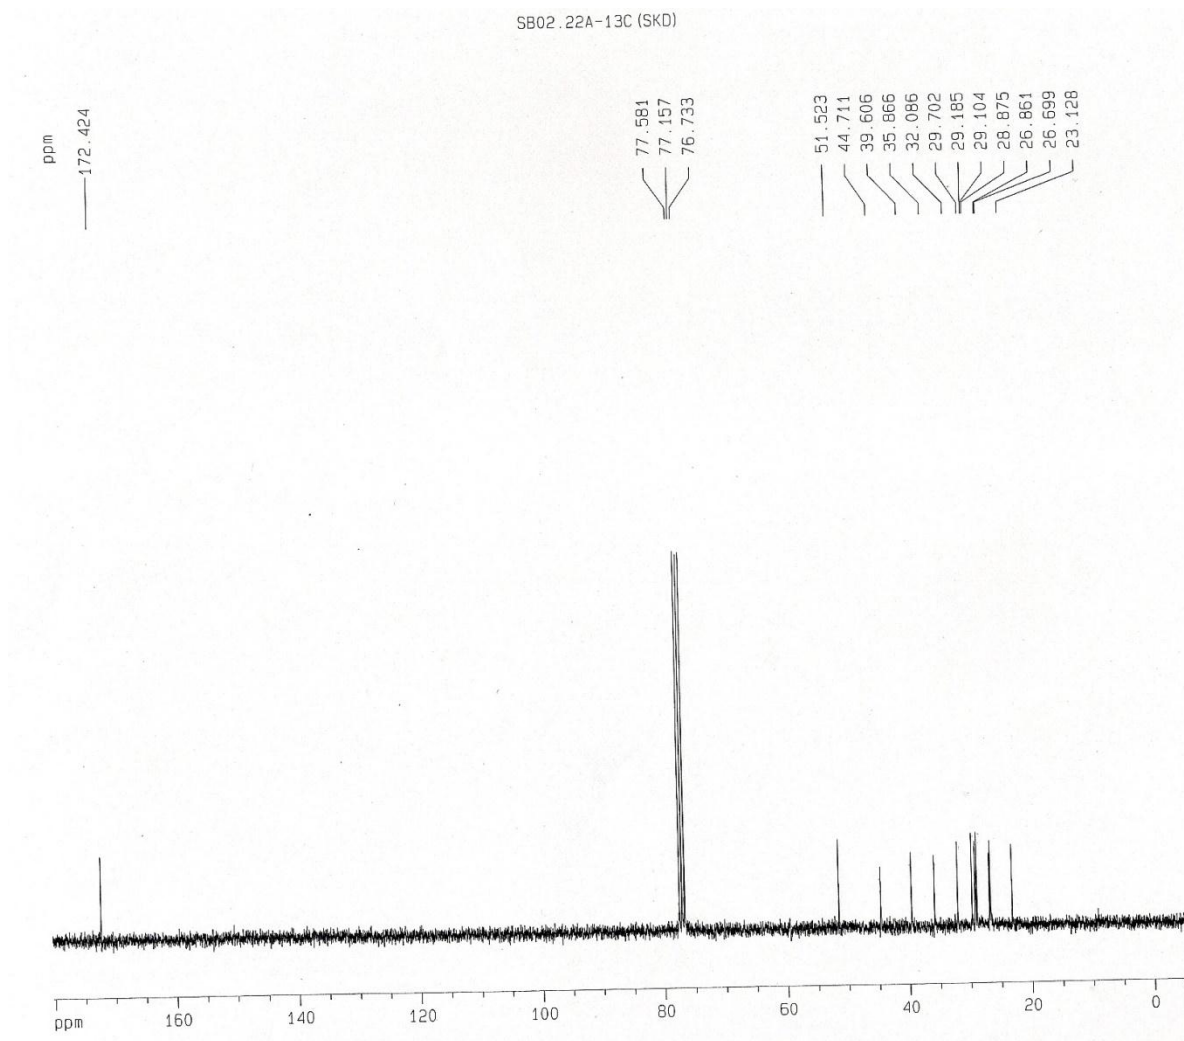



## ESI-MS

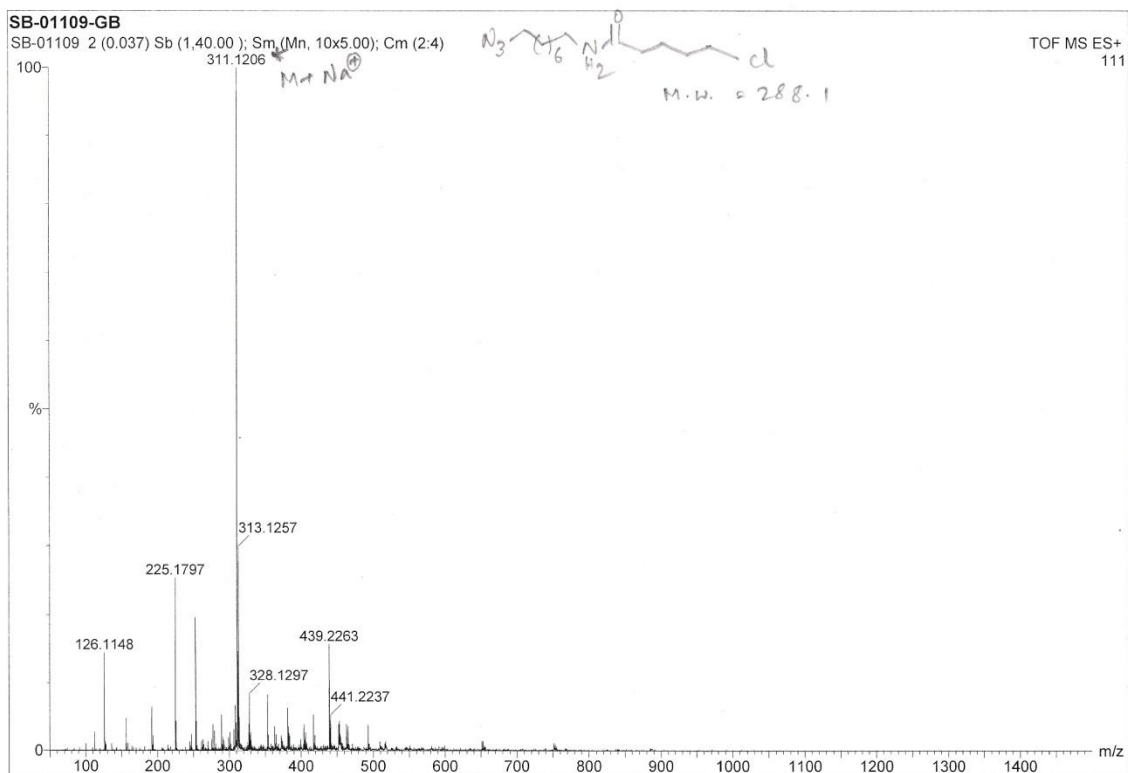

# 1-Azido-octylamidebutylthiol

$^1\text{H}$  NMR ( $\text{CDCl}_3$ )

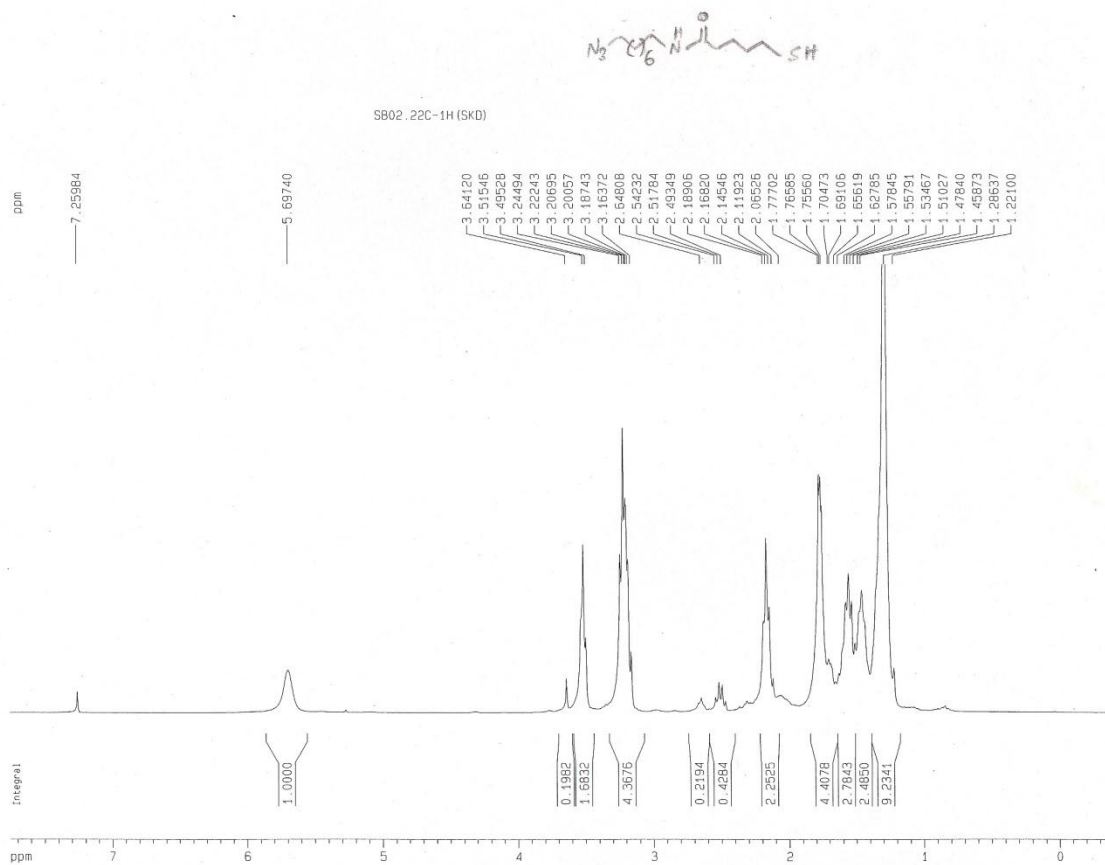

### <sup>13</sup>C NMR

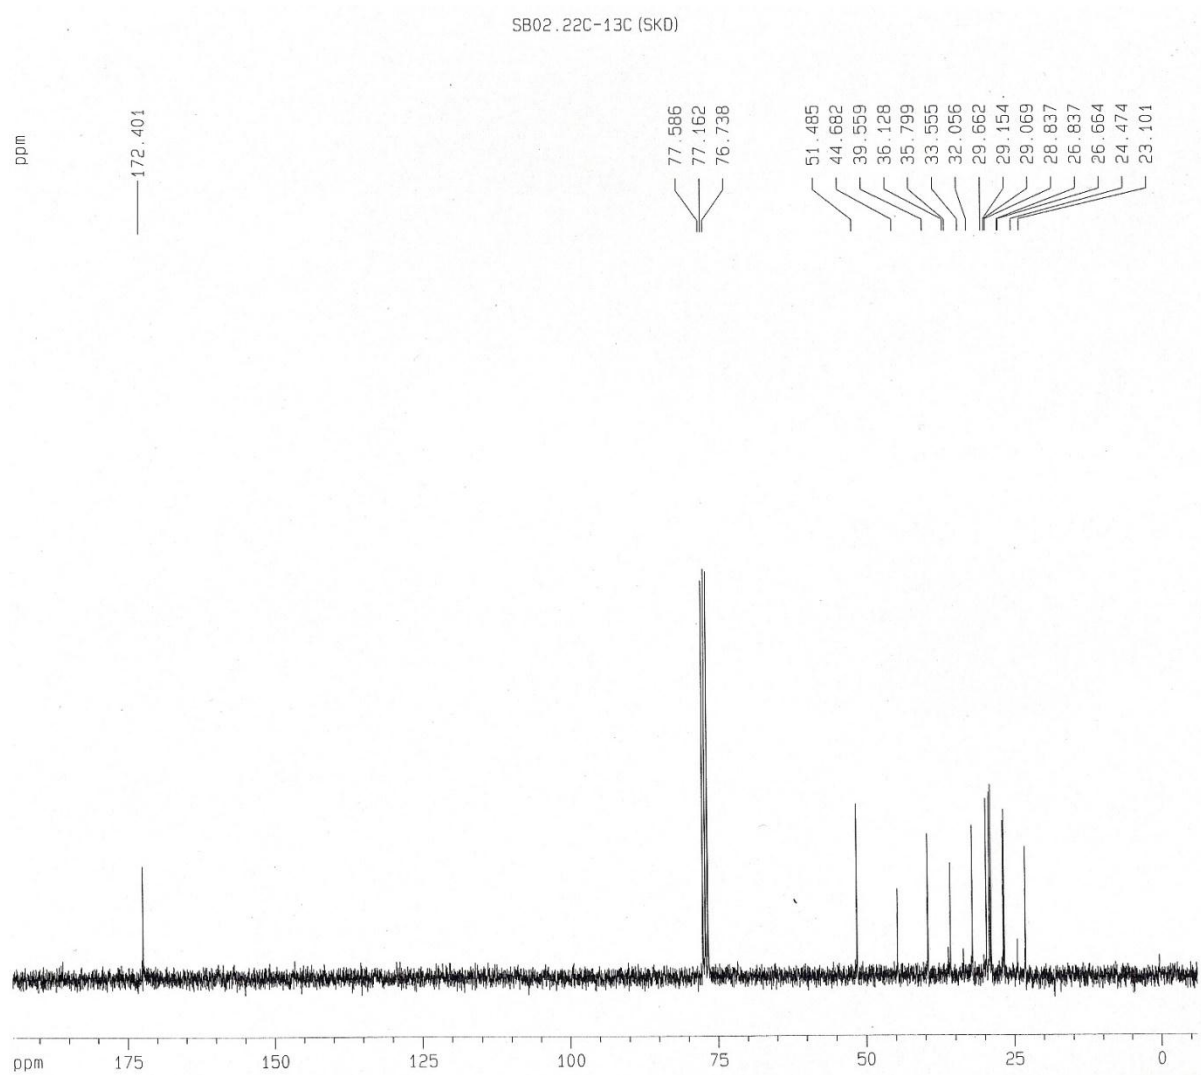

## ESI-MS

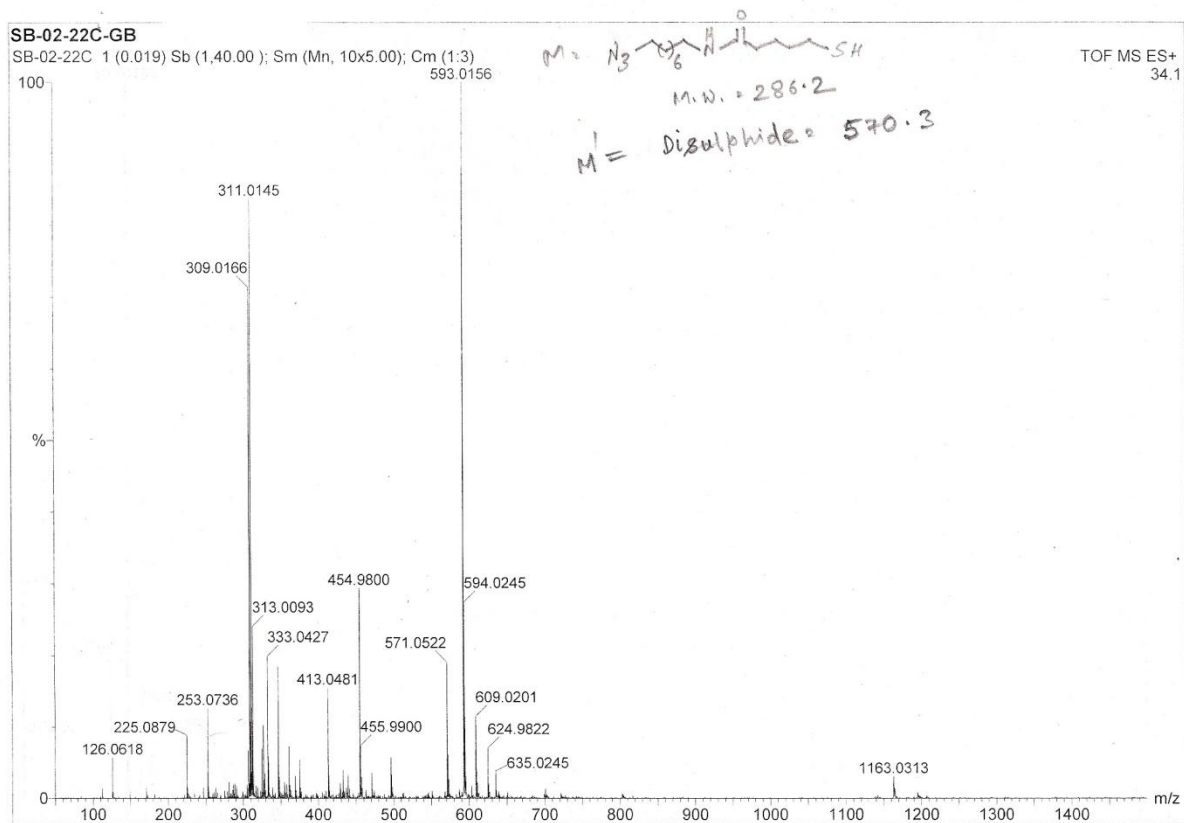

# Octylamidebutylthiol

$^1\text{H}$  NMR ( $\text{CDCl}_3$ )

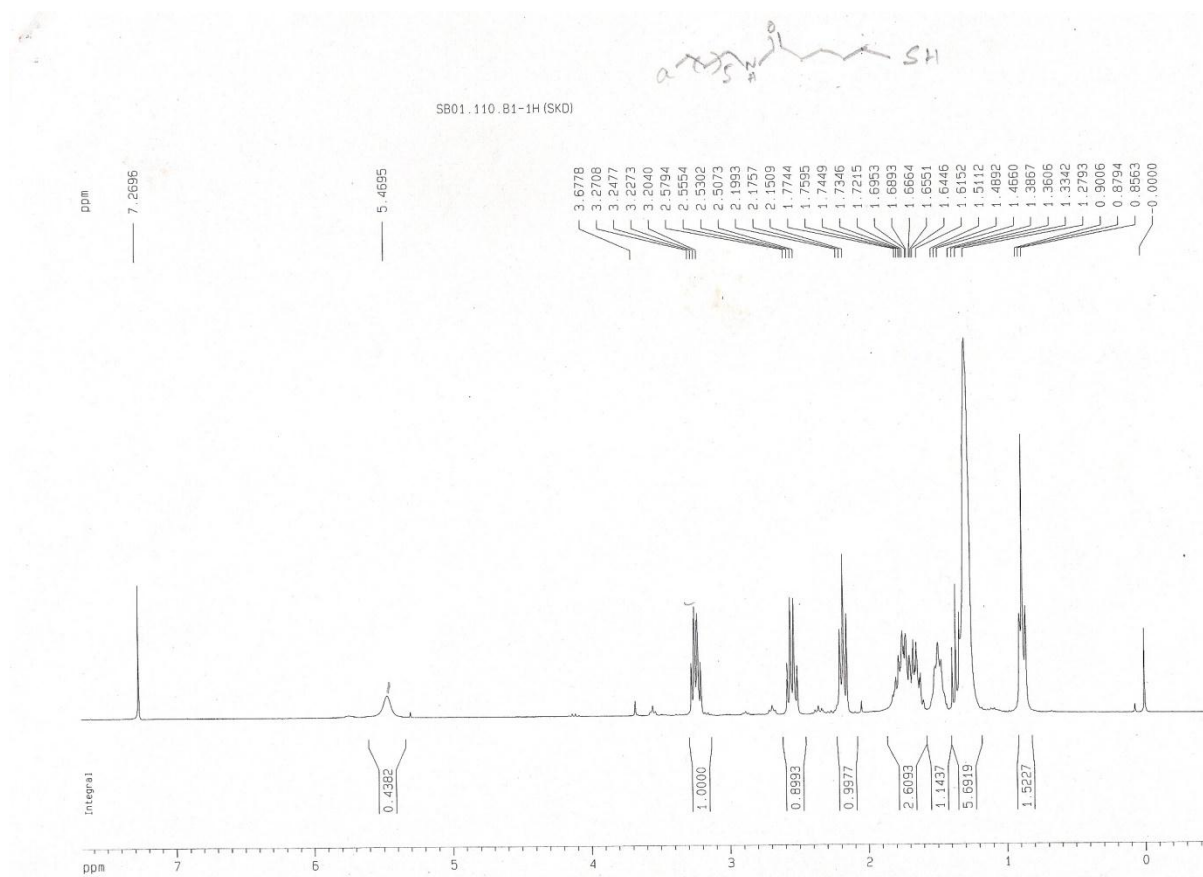

# $^{13}\text{C}$ NMR

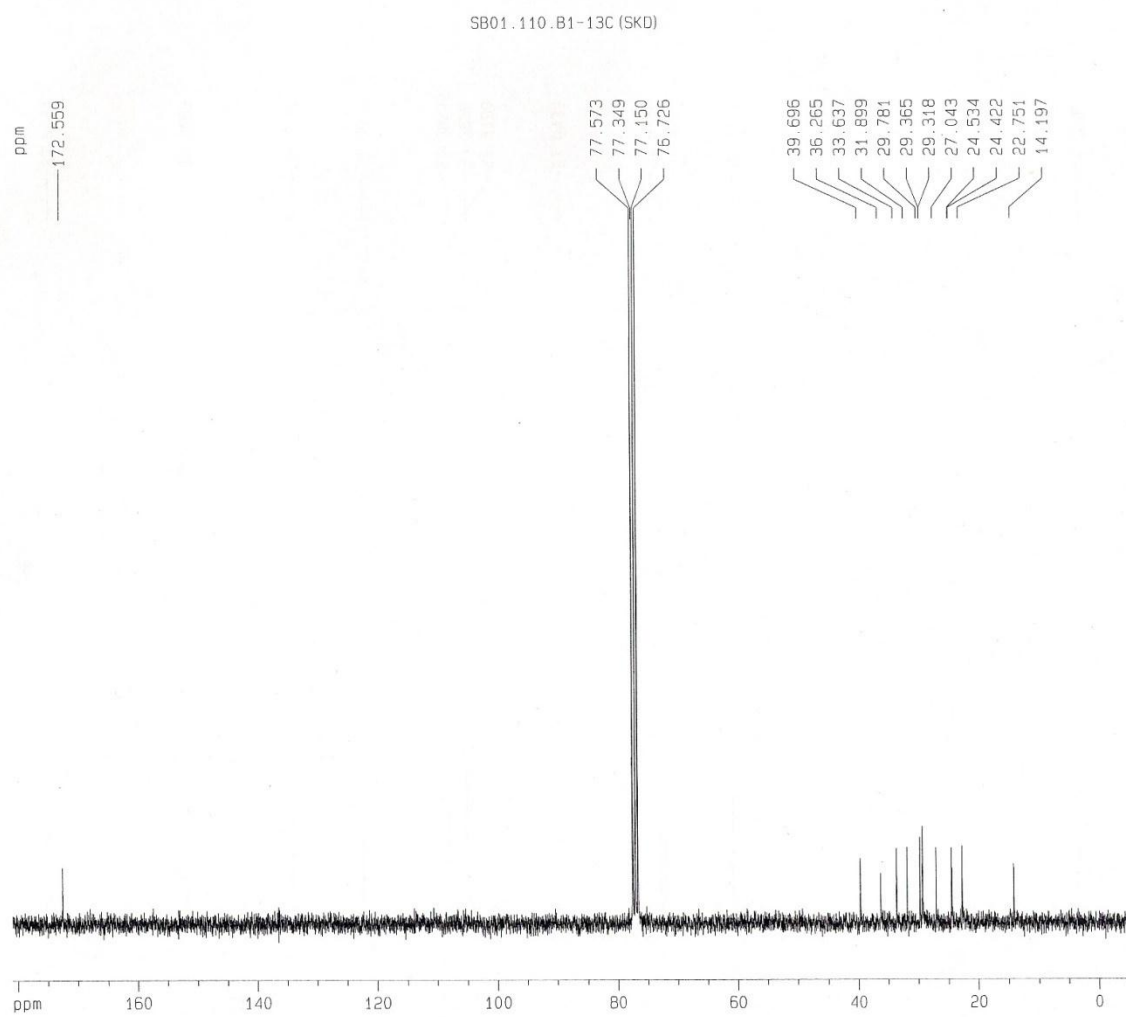

## ESI-MS

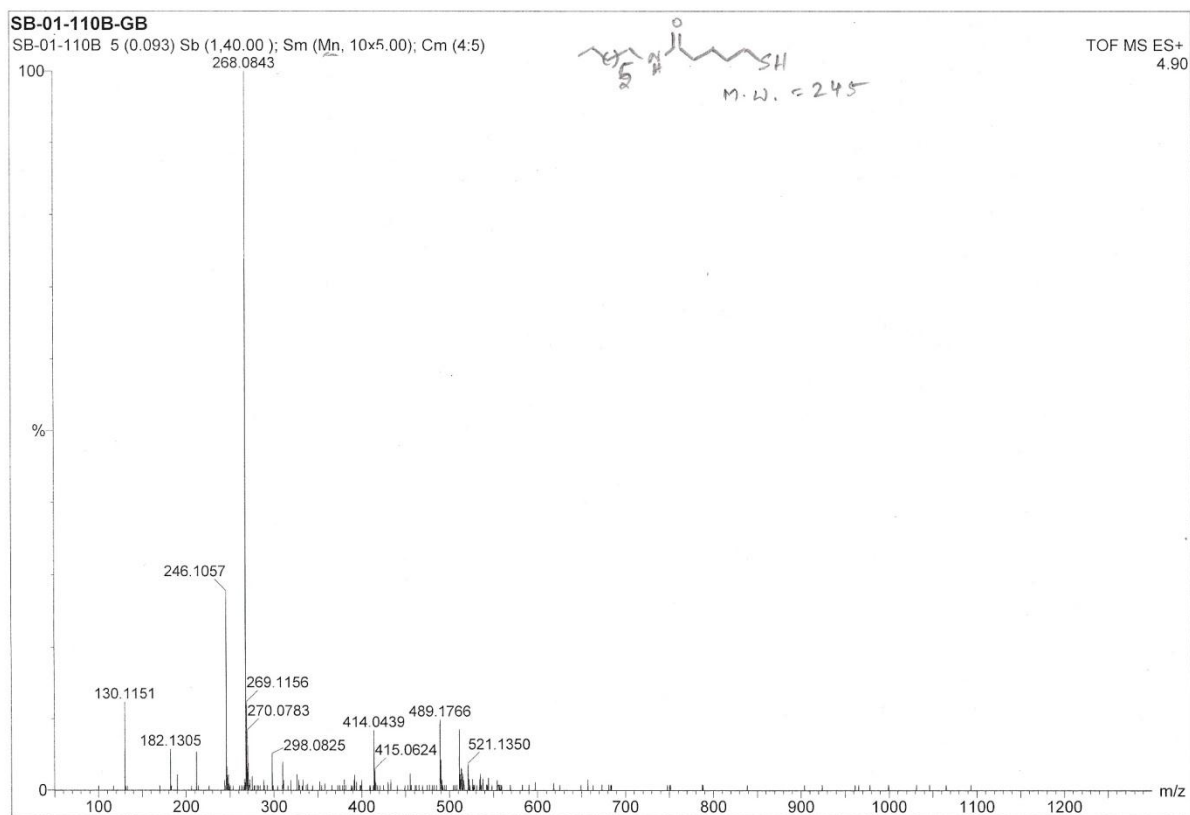

## Reference:

1 J. P. Collman, N. K. Devaraj and C. E. D. Chidsey, *Langmuir*, 2004, **20**, 1051-1053.
